1 **Cortico-subcortical functional connectivity profiles of resting-state networks in**  
2 **marmosets and humans**

3

4

5 **Abbreviated title:**

6 Cortico-subcortical networks in marmosets

7

8 **Authors and Affiliations:**

9 Yuki Hori<sup>1</sup>, David J. Schaeffer<sup>1</sup>, Atsushi Yoshida<sup>2</sup>, Justine C. Cléry<sup>1</sup>, Lauren K. Hayrynen<sup>1</sup>,

10 Joseph S. Gati<sup>1</sup>, Ravi S. Menon<sup>1</sup>, Stefan Everling<sup>1,3</sup>

11 <sup>1</sup> Centre for Functional and Metabolic Mapping, Robarts Research Institute, The University of  
12 Western Ontario, London, Ontario, Canada, N6A 5B7

13 <sup>2</sup> Laboratory of Sensorimotor Research, National Eye Institute, National Institutes of Health,  
14 Bethesda, Maryland, USA, 20892

15 <sup>3</sup> Department of Physiology and Pharmacology, The University of Western Ontario, London,  
16 Ontario, Canada, N6A 5C1

17

18 **Key words:** cortex, marmoset, resting-state functional MRI, subcortex

19

20 **Correspondence to:**

21 Stefan Everling, PhD

22 Centre for Functional and Metabolic Mapping, Robarts Research Institute, The University of  
23 Western Ontario, London, Ontario, Canada, N6A 5B7

24 Tel: +1-519-931-5777 ext.24359

25 Email: [severlin@uwo.ca](mailto:severlin@uwo.ca)

26

27 **Author contribution:** Y.H., D.J.S., A.Y. and S.E. designed research; Y.H., D.J.S., J.C.C.,  
28 L.K.H., J.S.G. and S.E. performed research; Y.H., D.J.S. and A.Y. analyzed data; Y.H. wrote  
29 the paper; and Y.H., D.J.S., A.Y., J.C.C., L.K.H., J.S.G., R.S.M. and S.E. edited the paper.

30

31 **Conflict of interest:** The authors declare no conflict of interest.

32

33 **Acknowledgements:** This work was supported by the Canadian Institutes of Health Research  
34 (FRN 148365, FRN 353372) and the Canada First Research Excellence Fund to BrainsCAN.

35 Human data were provided by the Washington University-University of Minnesota Consortium  
36 of the Human Connectome Project (WU-Minn HCP; Principal Investigators: David Van Essen  
37 and Kamil Ugurbil; 1U54MH091657) funded by the 16 NIH Institutes and Centers that support  
38 the NIH Blueprint for Neuroscience Research; and by the McDonnell Center for Systems  
39 Neuroscience at Washington University. We also thank Miranda Bellyou for animal preparation  
40 and care and Dr. Alex Li for scanning assistance.

41

42

43 **Abstract**

44 Understanding the similarity of cortico-subcortical networks topologies between humans and  
45 nonhuman primate species is critical to study the origin of network alternations underlying  
46 human neurological and neuropsychiatric diseases. The New World common marmoset  
47 (*Callithrix jacchus*) has become popular as a non-human primate model for human brain  
48 function. Most marmoset connectomic research, however, has exclusively focused on cortical  
49 areas, with connectivity to subcortical networks less extensively explored. In this study, we  
50 aimed to first isolate patterns of subcortical connectivity with cortical resting-state networks  
51 (RSNs) in awake marmosets using resting-state functional magnetic resonance imaging (RS-  
52 fMRI), then to compare these networks to those in humans using connectivity fingerprinting.  
53 While we could match several marmoset and human RSNs based on their functional  
54 fingerprints, we also found a few striking differences, for example strong functional connectivity  
55 of the default mode network with the superior colliculus in marmosets that was much weaker in  
56 humans. Together, these findings demonstrate that many of the core cortico-subcortical  
57 networks in humans are also present in marmosets, but that small, potentially functionally  
58 relevant differences exist.  
59

## 60 **Introduction**

61 The New World common marmoset (*Callithrix jacchus*) has become popular as a model for  
62 human brain function (Okano et al., 2016). Owing to a developed frontal cortex (Okano and  
63 Mitra, 2015) and the feasibility of creating transgenic marmosets (Park et al., 2016; Sasaki et  
64 al., 2009; Tomioka et al., 2017a; Tomioka et al., 2017b), the marmoset has become a  
65 promising candidate for assessing neuropsychiatric disorders, especially those involving frontal  
66 impairments that are more difficult to study in rodent models (Okano and Mitra, 2015). In the  
67 past few years, marmoset brain connectomics, including corticocortical anatomical connections  
68 (Majka et al., 2020; Majka et al., 2016), functional networks/connections (Hori et al., 2020a;  
69 Hori et al., 2020b), and white matter pathways (Liu et al., 2020; Schaeffer et al., 2017), are  
70 becoming increasingly well-studied. In addition, similarities of these connections have been  
71 found between marmosets and humans (Liu et al., 2020; Schaeffer et al., 2019a; Schaeffer et  
72 al., 2019b; Solomon and Rosa, 2014).

73         Demonstrating homologies across species is a challenging endeavor due to both  
74 limitations in measuring networks using the same method across species, and in identifying  
75 analogous brain areas to compare across vastly different brain morphologies. Resting-state  
76 functional magnetic resonance imaging (RS-fMRI) allows for circumvention of some of these  
77 challenges by allowing for non-invasive identification of robust and reproducible resting-state  
78 networks across different species (Damoiseaux et al., 2006; Fox and Raichle, 2007; Smith et  
79 al., 2013; Sporns, 2013). With recent advances in MRI hardware, we are now able to measure  
80 the functional networks/connectivities in awake marmosets (Belcher et al., 2013; Cléry et al.,  
81 2020; Hori et al., 2020b; Schaeffer et al., 2019c). Particularly, the marmoset's small size is  
82 ideal for ultra-high field small-bore fMRI, affording high spatial resolution and signal-to-noise  
83 ratio (SNR) even in subcortical areas. Despite the ability to acquire MRI-based connectivity  
84 data in both marmosets and humans, the problem still stands of how to compare topologies  
85 amid major morphological differences. Connectivity fingerprinting have been offered as a  
86 method to circumvent this problem; this approach was originally proposed by Passingham and  
87 colleagues as a way to quantitatively evaluate the connections of a single cortical area with a

88 selected set of other areas (Passingham et al., 2002). More recently, Mars and colleagues  
89 have suggested the feasibility of this approach as a tool for comparing various aspects of brain  
90 organization across and within species (Balsters et al., 2020; Mars et al., 2018; Mars et al.,  
91 2016; Schaeffer et al., 2020). Here, we employed this technique to compare cortico-subcortical  
92 fingerprints of resting-state networks (RSNs) in marmosets and humans, allowing for  
93 identification of inter-species similarities of cortico-subcortical connectivities.

94 We applied recent advances in hardware development for awake marmoset imaging,  
95 including a custom-made multi-array coil, a gradient coil (Handler et al., 2020), and an  
96 integrated head-fixation system (Schaeffer et al., 2019c) designed for small-bore ultra-high  
97 field MRI (9.4 T). This system allows for nearly motion-less, high spatial resolution, and signal-  
98 to-noise ratio (SNR) images. For human analyses, we used openly available datasets from the  
99 Human Connectome Project (HCP) (Van Essen et al., 2013). We used a data-driven approach  
100 via independent component analysis to identify RSNs in both marmosets and humans, then  
101 specified the subcortical connections with each cortical RSN. The cortico-subcortical functional  
102 fingerprints were created based on subcortical volumes of interests (VOIs), and were used to  
103 identify putative homologous RSNs between marmosets and humans.

104

## 105 **Results**

### 106 *Cortico-subcortical RSNs in marmosets*

107 The overarching objective of this study was to identify the subcortical areas related to each  
108 cortical RSN in marmosets, then to compare these cortico-subcortical connections between  
109 marmosets and humans. To do so, we first identified cortical functional networks in the  
110 marmosets (see Supplementary Fig. 1). After implementation of group ICA (Beckmann and  
111 Smith, 2004) using awake RS-fMRI data in only cortical regions, 6 components were identified  
112 as unstructured and/or physiological noise. The remaining 14 components demonstrated  
113 meaningful RSNs (Fig. 1). These RSNs were thresholded at  $z = 2.3$  for visual purposes.  
114 Obtained RSNs were consistent with previously observed networks in marmosets (Belcher et  
115 al., 2013; Ghahremani et al., 2016; Hori et al., 2020b) such as default mode network (DMN)  
116 (Fig. 1A), attention network (ATN) (Fig. 1B), salience network (SAN) (Fig. 1C), left and right

117 primary visual networks (pVIS-Lt/Rt) (Figs. 1D, 1E), orbitofrontal network (ORN) (Fig. 1F), high-  
118 order VISs (hVIS1-4: Fig. 1G-J), somatomotor networks ventral part (SMNv: Fig. 1K), dorsal  
119 part (SMNd: Fig. 1L) and medial part (SMNm: Fig. 1M), and premotor network (PMN: Fig. 1N).

120 We calculated correlation coefficients between the time courses in each cortical RSN  
121 and the time courses in each subcortical voxel. The functional connectivity maps (z-score  
122 maps) in the subcortical areas were then averaged across scans. Averaged z-score values in  
123 each subcortical area corresponding to each RSN are shown in Supplementary Fig 2, and  
124 representative activation maps (z-score maps) are presented in Fig. 2. These z-score maps  
125 were normalized to be maximum z-value equal to 1 and were thresholded at 0.2 for visual  
126 purposes. The main subcortical area in the DMN (corresponding to Fig. 1A) was the  
127 hippocampus (Fig. 2A), which is already known as a part of DMN in humans (Greicius et al.,  
128 2004), macaques (Mantini et al., 2011; Vincent et al., 2007), and rats (Lu et al., 2012). The ATN  
129 (corresponding to Fig. 1B) was strongly functionally connected with caudate and putamen (Fig.  
130 2B). The primary subcortical area connected to the SAN (corresponding to Fig. 1C) was the  
131 inferior colliculus (IC) (Fig. 2C). The primary VISs (corresponding to Fig. 1D and 1E) exhibited  
132 strong functional connectivities with the lateral geniculate nucleus (LGN), superior colliculus  
133 (SC), and ventral lateral (VL), ventral posterior (VP), and pulvinar thalamic nuclei (Fig. 2D).  
134 These activations were found in both left and right visual networks. The main subcortical areas  
135 in the ORN (corresponding to Fig. 1F) were the ventral striatum, caudate, putamen, and  
136 anterior (ANT), laterodorsal (LD), mediodorsal (MD), ventral anterior (VA), and VL thalamic  
137 nuclei (Fig. 2E). The main subcortical areas in the higher-order VIS were the SC and LGN for  
138 hVIS3 and hVIS4 (Fig. 2F), while there was functional connectivity with the caudate and  
139 putamen in these subcortical regions for hVIS1 and hVIS2. In the somatomotor networks, the  
140 main subcortical components were the hippocampus and VP thalamic nucleus for the lateral  
141 and medial networks (Fig. 2G). In the premotor network, the main subcortical component was  
142 VL thalamic nucleus (Fig. 2H). To assign subcortical voxels to networks, the correlation  
143 coefficients between the time courses in each cortical network and the time courses in each  
144 subcortical voxel were calculated and Fisher's z-transformed. Then, the network with the

145 highest z-value among all networks was selected and assigned as the main network related to  
146 the voxel (Fig. 3).

147

#### 148 *Cortico-subcortical networks in humans*

149 For human RSNs, 10 components were identified as unstructured and/or physiological noise.  
150 The remaining 10 components were identified as meaningful functional neural networks. These  
151 RSNs were thresholded at  $z = 3.1$  for visual purposes and were named based on the main  
152 activation areas with reference to the recent paper, where each cortical partition is assigned to  
153 one of the networks (Ji et al., 2019). As such, we identified the DMN (Supplementary Fig. 3A),  
154 frontoparietal network (FPN) (Supplementary Fig. 3B), ATN (Supplementary Fig. 3C), two  
155 SMNs (ventral: Supplementary Fig. 3D, dorsomedial: 3E), auditory network (AUD)  
156 (Supplementary Fig. 3F), two VISs (primary: Supplementary Fig. 3G, high-order:  
157 Supplementary Fig. 3H), language network (LAN) (Supplementary Fig. 3I) and cingulo-  
158 opercular network (CON) (Supplementary Fig. 3J). Subcortical areas corresponding to each  
159 RSN are shown in Supplementary Fig 4. The main subcortical area in the DMN (corresponding  
160 to Supplementary Fig. 3A) was the hippocampus (Supplementary Fig. 4A). The FPN  
161 (corresponding to Supplementary Fig. 3B) was connected with the caudate and putamen  
162 (Supplementary Fig. 4B). The primary subcortical areas connected to the ATN (corresponding  
163 to Supplementary Fig. 3C) were the amygdala, SC, and VP and pulvinar thalamic nuclei  
164 (Supplementary Fig. 4C). In the SMNs (corresponding to Supplementary Fig. 3D and 3E), the  
165 main subcortical components were the hippocampus and VP thalamic nucleus for both ventral  
166 and lateral networks (Supplementary Fig. 4D and 4E). The AUD (corresponding to  
167 Supplementary Fig. 3F) were functionally connected to all thalamic nuclei (Supplementary Fig.  
168 4F). The primary VIS (corresponding to Supplementary Fig. 3G) exhibited strong functional  
169 connectivity with the LGN, SC, and VP and pulvinar thalamic nuclei (Supplementary Fig. 4G),  
170 and these activations were also found in the high-order VIS (Supplementary Fig. 3H and 4H).  
171 The main subcortical areas in the LAN (corresponding to Supplementary Fig. 3I) were the  
172 caudate nucleus and amygdala (Supplementary Fig. 4I). The main subcortical areas in the  
173 CON (corresponding to Supplementary Fig. 3J) were the putamen and, ANT, MD, and LD

174 thalamic nuclei (Supplementary Fig. 4J). These subcortical connections in each network were  
175 consistent with a previous study (Ji et al., 2019), where they showed caudate, putamen,  
176 hippocampus, and amygdala were correlated with FPN, CON, DMN/SMN, and LAN,  
177 respectively. The SC and LGN were correlated with primary VIS, which was also consistent  
178 with our results. Generally, the subcortical connections except for thalamic nuclei in each  
179 human network were similar to the corresponding marmoset networks. For both species, for  
180 example, the DMN included hippocampus, and the VIS included LGN and SC. However,  
181 thalamic connections in the VIS did not match between marmosets and humans. The VIS in  
182 marmosets was strongly connected to the VL thalamic nucleus, while the VIS in humans was  
183 mainly connected to the VP and pulvinar thalamic nuclei.

184

#### 185 *Comparison of subcortical connectivity profiles*

186 Manhattan distance was used to quantitatively determine how well each subcortical  
187 connectivity profile in marmoset RSNs matched the connectivity profile of corresponding  
188 human RSNs. Connectivity fingerprints were created for marmosets and humans by  
189 determining the mean z-values in seven target regions placed in caudate, putamen,  
190 hippocampus, amygdala, SC, IC, and LGN. We did not include the other thalamic VOIs in the  
191 fingerprint analysis as these regions are prone to residual global artifacts (Ji et al., 2019).  
192 Permutation tests were performed to evaluate statistically significant matches between human  
193 and marmoset fingerprints. For each of the ten human RSNs, we tested the hypothesis that the  
194 difference between the fingerprints in humans and the target fingerprint in marmosets was  
195 smaller than expected by chance. As such, we calculated the Manhattan distance with 10,000  
196 different permutations of the target VOIs in marmosets, following normalization of each  
197 fingerprint to a range of 0 (weakest functional connection with any of the target regions) and 1  
198 (strongest functional connection with any of the target regions). A value less than 5 percentile  
199 of the histogram of Manhattan distance was considered to be significantly similar fingerprints  
200 across species.

201           The results revealed a number of significant matches between human and marmoset  
202 RSNs based on their fingerprints (Fig. 4). The human DMN significantly matched with the



203 marmoset DMN with the strong hippocampus connections ( $p < 0.05$ ), while the marmoset DMN  
204 also exhibited strong FC with the SC (Fig. 5). The FPN in humans had similar subcortical  
205 patterns to the ATN, ORN, and VIS1 in marmosets with caudate and putamen connections ( $p <$   
206  $0.05$ ; Fig. 6), but the fingerprint of the human ATN did not match with the fingerprint of the  
207 marmoset frontoparietal network that we previously labeled ATN in marmosets (Hori et al.,  
208 2020b). Instead, in addition to a match with the human FPN, the fingerprint of the marmoset  
209 ATN network also matched with the fingerprint of the human LAN ( $p < 0.05$ ; Fig. 7). The primary  
210 VIS in humans matched the marmoset primary VIS, high-order VIS3, and VIS4 with strong  
211 connections to the SC and LGN ( $p < 0.05$ ; Fig. 8). The secondary VIS in humans also matched  
212 the marmoset high-order VIS ( $p < 0.05$ ; Fig. 9). The CON in humans matched the marmoset  
213 ORN and VIS1 ( $p < 0.05$ ; Fig. 10).

214

## 215 **Discussion**

216 In the present study, we identified the cortico-subcortical functional connections of RSNs in  
217 marmosets, then matched these networks with similar human networks based on the  
218 fingerprints of their cortico-subcortical functional connectivity profiles. We found that the  
219 cortico-subcortical fingerprints of several RSNs matched between marmosets and humans,  
220 suggesting a similar functional cortico-subcortical organization of these networks in these two  
221 species.

222 The DMN includes the hippocampus not only in humans (Greicius et al., 2004), but  
223 also in macaques (Mantini et al., 2011; Vincent et al., 2007), and rats (Lu et al., 2012). Our  
224 results showed that the marmoset DMN includes the hippocampus as well, indicating that it  
225 may be a conserved feature across species. Note, however, that the cortical DMN in  
226 marmosets was also functionally connected to the SC, which is not the case for the human  
227 DMN. In addition to this difference in subcortical connectivity, the marmoset DMN includes a  
228 fairly large parietal region that includes areas LIP, VIP, and MIP. Microstimulation in this region  
229 around the shallow intraparietal sulcus evokes contralateral saccades (Ghahremani et al.,  
230 2019) and single neurons in this region are active for saccadic eye movements (Ma et al.,  
231 2020). On the other hand, the parietal region of the human DMN does not include the parietal

232 eye fields defined by multi-modal MRI techniques (Glasser et al., 2016). This discrepancy  
233 might produce the difference of the connections with the SC between the species. It also  
234 suggests that the marmoset DMN may not have sub serve all of the same functions as the  
235 human DMN.

236         The marmoset ATN consisted of ventral frontal areas (8aV, 45), which are associated  
237 with small saccadic eye movements (Selvanayagam et al., 2019). This network was mainly  
238 connected to the caudate and putamen, and this subcortical activation pattern was consistent  
239 with the human FPN, which includes the FEF and intraparietal areas that are involved in  
240 saccade generation (Luna et al., 1998) and attention (Corbetta et al., 1998). Previous human  
241 (Raemaekers et al., 2006; Raemaekers et al., 2002) and macaque studies (Hikosaka and  
242 Wurtz, 1989; Phillips and Everling, 2012) have shown activations in the striatum (both caudate  
243 and putamen) during saccade tasks. The parietal component of the marmoset ATN, however,  
244 lies anterior to area LIP which is activated by saccadic eye movements (Schaeffer et al.,  
245 2019d) and where saccades can be evoked by electrical microstimulation in marmosets  
246 (Ghahremani et al., 2019), arguing perhaps against a pure role of this network in saccadic eye  
247 movements. In fact, we found that the human language network (LAN) also matched the  
248 marmoset ATN in terms of its cortico-subcortical connectivity fingerprint. In both species, the  
249 networks showed strong functional connectivity with the caudate. In addition, there are also  
250 clear similarities in the cortical regions between the marmoset ATN and the human LAN.  
251 Broca's area (area 44, 45) is a prominent part of the human LAN and the marmoset ATN  
252 network also includes area 45. Single neurons in marmoset area 45 and 8aV respond to  
253 marmoset vocalizations and many are active for vocalizations (Miller et al., 2015), supporting a  
254 role of this area in vocalization. The finding that the cortico-subcortical fingerprint of the ATN  
255 matched with both the human FPN and the LAN may suggest that this core frontoparietal  
256 network is the evolutionary precursor to these networks. Although we have labeled this network  
257 as ATN here to be consistent with a previous paper (Hori et al., 2020b), a better label would  
258 probably be just FPN for this network, consistent with an older report from our lab that used  
259 ICA to identify RSNs in anesthetized marmosets (Ghahremani et al., 2016).

260           The subcortical pattern in the human FPN also showed a match to the marmoset  
261 hVIS1. The main cortical activations in hVIS1 were along with the ventral visual stream  
262 including TE3, V4T, and FST (Hung et al., 2015a; Schaeffer et al., 2019d). This is consistent  
263 with human and macaque studies showing that the FPN includes a part of ventral visual stream  
264 (Hutchison et al., 2012; Ji et al., 2019; Thomas Yeo et al., 2011). In addition, both human and  
265 macaque FEF are functionally connected to these regions (Hutchison et al., 2012). As such,  
266 the hVIS1 in marmosets seems to correspond to the temporal regions in the human FPN.  
267 Interestingly, the subcortical pattern in the hVIS1 also showed a match to the human CON as  
268 well as FPN. These two functional networks display increased activity during the performance  
269 of complex cognitive tasks (Dosenbach et al., 2006; Sheffield et al., 2015; Wallis et al., 2015),  
270 and both are associated with top-down control associated with executive functioning  
271 (Dosenbach et al., 2007). Taken together with our findings, the marmoset hVIS1 might be  
272 related to both FPN and CON through the putamen and caudate and play an important role in  
273 top-down cognitive processing.

274           The cortical visual networks in marmosets were strongly connected to the SC, LGN,  
275 VP, and PUL. These regions are known to be associated with the visual system (Hung et al.,  
276 2015a; Hung et al., 2015b), and are structurally connected to visual-related cortices (Kaas and  
277 Lyon, 2007; Solomon and Rosa, 2014; Zeater et al., 2019). We found that these subcortical  
278 activation patterns in marmoset corresponded well to those in humans, suggesting that the  
279 visual systems have a similar cortico-subcortical organization in both species. Previous  
280 anatomical studies and electrophysiological recordings in marmosets have also shown that this  
281 species' cortical visual hierarchy closely resembles that of other primates, including humans  
282 (McDonald et al., 2014; Mitchell and Leopold, 2015; Yu and Rosa, 2010).

283

## 284 Conclusion

285 We have shown here that many of the marmoset RNSs can be matched to human RSNs  
286 based on their cortico-subcortical fingerprint. While this suggests a similar cortico-subcortical  
287 network organization in marmosets and humans, our results also show that there are

288 differences in the connectivity profiles that likely have consequences on the actual functions of  
289 these RSNs. Electrophysiological and task-based fMRI studies in marmosets will be necessary  
290 to further investigate functional similarities and differences in RSN organization between the  
291 two species.

292

## 293 **Methods**

### 294 *Animal preparation*

295 All surgical and experimental procedures were in accordance with the Canadian Council of  
296 Animal Care policy and a protocol approved by the Animal Care Committee of the University of  
297 Western Ontario Council on Animal Care. All animal experiments complied with the Animal  
298 Research: Reporting *In Vivo* Experiments (ARRIVE) guidelines. Four male common  
299 marmosets weighting 390 g (3 years old), 245 g (1.5 years old), 330g (1.5 years old), and 360g  
300 (1.5 years old), and one female marmoset weighting 306 g (1.3 years old) were used in *in-vivo*  
301 and *ex-vivo* study, respectively.

302 Four marmosets for *in-vivo* experiments underwent surgery to implant a head  
303 chamber to fix the head during MRI acquisition as described in previous reports (Johnston et  
304 al., 2018; Schaeffer et al., 2019c). Briefly, the marmoset was placed in a stereotactic frame  
305 (Narishige Model SR-6C-HT), and several coats of adhesive resin (All-bond Universal Bisco,  
306 Schaumburg, Illinois, USA) were applied using a microbrush, air dried, and cured with an  
307 ultraviolet dental curing light. Then, a dental cement (C & B Cement, Bisco, Schaumburg,  
308 Illinois, USA) was applied to the skull and to the bottom of the chamber, which was then  
309 lowered onto the skull via a stereotactic manipulator to ensure correct location and orientation.  
310 The chamber was 3D printed at 0.25 mm resolution using stereolithography and a clear  
311 photopolymer resin (Clear-Resin V4; Form 2, Formlabs, Somerville, Massachusetts, USA). The  
312 marmosets were first acclimatized to the animal holder, head fixation system, and a mock MRI  
313 environment prior to the first imaging session (Silva et al., 2011). Each marmoset was trained  
314 over the course of three weeks. During the first week, marmosets entered the tube and were  
315 constrained using only the neck and tail plates for increasingly long periods of time (up to 30

316 minutes). During the second week, the restraint tube was inserted into a mock MRI tube (a 12  
317 cm inner diameter tube) to simulate the scanner environment; MRI sounds were played at  
318 increasingly loud volumes (up to 80 dB) for increasingly long durations, up to 60 minutes  
319 sessions. In week 3, marmosets were head-fixed via the fixation pins, inserted into the mock  
320 MRI tube and exposed to the MRI sounds. Within each session, the animals are presented with  
321 reward items (pudding or marshmallow fluff) for remaining still (calmly facing forward, with  
322 minimal movement of limbs). Throughout the training sessions, the behavioral rating scale  
323 described by Silva et al. (2011) was used to assess the animals' tolerance to the  
324 acclimatization procedure by the end of week 3, all three marmosets scored 1 or 2 on this  
325 assessment scale (Silva et al., 2011), showing calm and quiet behavior, with little signs of  
326 agitation.

327         To create volumes of interests (VOIs) in subcortical area, we acquired *ex-vivo* MRI as  
328 it allowed for longer scanning time at a much higher resolution (0.1 mm isotropic). To prepare  
329 for *ex-vivo* MRI, one marmoset was euthanized through transcardial perfusion and its brain  
330 was extracted at the end of the procedure. Anesthesia was initially induced with 30 mg/kg of  
331 ketamine and maintained with 4% isoflurane in 1.5-2% oxygen. The animal was then  
332 transcardially perfused with 0.9% sodium chloride solution, followed by 10% formaldehyde  
333 buffered solution (formalin). The brain was then extracted and stored in 10% buffered formalin  
334 for over a week.

335

### 336 *Image acquisition*

337 For the *in-vivo* experiment, each animal was fixed to the animal holder using a neck plate and  
338 a tail plate. The animal was then head-fixed using fixation pins in the MRI room to minimize the  
339 time in which the awake animal was head fixed (Schaeffer et al., 2019c). Once fixed, a  
340 lubricating gel (MUKO SM321N, Canadian Custom Packaging Company, Toronto, Ontario,  
341 Canada) was squeezed into the chamber and applied to the brow ridge to reduce magnetic  
342 susceptibility.

343 Data were acquired using a 9.4 T 31 cm horizontal bore magnet (Varian/Agilent,  
344 Yarnton, UK) and Bruker BioSpec Avance III HD console with the software package  
345 Paravision-6 (Bruker BioSpin Corp, Billerica, MA), a custom-built high-performance 15-cm-  
346 diameter gradient coil with 400-mT/m maximum gradient strength (Handler et al., 2020), and  
347 the 5-channel receive coil (Schaeffer et al., 2019c). Radiofrequency transmission was  
348 accomplished with a quadrature birdcage coil (12-cm inner diameter) built in-house. All imaging  
349 was performed at the Centre for Functional and Metabolic Mapping at the University of  
350 Western Ontario.

351 Functional images were acquired with 6-22 functional runs (at 400 or 600 volumes each) for  
352 each animal in the awake condition, using gradient-echo based single-shot echo-planar  
353 imaging sequence with the following parameters: TR = 1500 ms, TE = 15 ms, flip angle = 40°,  
354 field of view (FOV) = 64 × 64 mm, matrix size 128 × 128, voxel size 0.5 mm isotropic, slices =  
355 42, bandwidth = 500 kHz, generalized autocalibrating parallel acquisition (GRAPPA)  
356 acceleration factor (anterior-posterior) = 2. Total scan time for all functional imaging was ~14h.  
357 A T2-weighted image (T2w) was also acquired for each animal using rapid imaging with  
358 refocused echoes (RARE) sequences with the following parameters: TR = 5500 ms, TE = 53  
359 ms, FOV = 51.2 × 51.2 mm, matrix size = 384 × 384, voxel size = 0.133 × 0.133 × 0.5 mm,  
360 slice 42, bandwidth = 50 kHz, GRAPPA acceleration factor (anterior-posterior) = 2.

361 For *ex-vivo* imaging, a formalin-fixed marmoset brain was submerged in lubricant  
362 (Christo-lube; Lubrication technology Inc., Franklin Furnace, OH) to avoid magnetic  
363 susceptibility-related distortion artifacts, and three-dimensional multi-echo spin-echo images  
364 were acquired as following parameters: TR = 200 ms, TE = 3. 5, 8.5, 13.5, 18.5, 23.5 ms,  
365 FOV = 33 × 28.8 × 36 mm, matrix size = 330 × 288 × 360, voxel size = 0.1 mm isotropic  
366 resolution, average=4. The average image across different TE images was calculated to  
367 increase the signal-to-noise ratio (SNR) and it was used to create the subcortical volume-of-  
368 interests (VOIs).

369

370 *Marmoset image preprocessing*

371 Data was preprocessed using FSL software (Smith et al., 2004). Raw MRI images were first  
372 converted to Neuro Informatics Technology Initiative (NIfTI) format (Li et al., 2016) and  
373 reoriented from sphinx position. Brain masks for *in-vivo* images were created using FSL tools  
374 and the National Institutes of Health (NIH) T2w brain template (Liu et al., 2018) For each  
375 animal, the brain-skull boundary was first roughly identified from individual T2w using the brain  
376 extraction tool (BET) with the following options; radius of 25-40 and fractional intensity  
377 threshold of 0.3 (Smith, 2002). Then, the NIH T2w brain template was linearly and non-linearly  
378 registered to the individual brain image using FMRIB's linear registration tool (FLIRT) and  
379 FMRIB's nonlinear registration tool (FNIRT) to more accurately create the brain mask. After  
380 that, the brain was extracted using the brain mask. RS-fMRI images were corrected for motion  
381 using FLIRT. Principal component analysis (PCA) was applied to remove the unstructured  
382 noise from the RS-MRI time course, followed by independent component analysis (ICA) with  
383 the decomposition number of 200 using Multivariate Exploratory Linear Optimized  
384 Decomposition into the Independent Components (MELODIC) module of the FSL software  
385 package. Obtained components were classified as signal or noise (such as eye movement,  
386 CSF pulsation, heart rate, and respiratory artifacts) based on the criteria as shown a previous  
387 report (Griffanti et al., 2017), and noise components were regressed out from the rfMRI time  
388 course using FSL tool (`fsl_regfilt`). All rfMRI images were finally normalized to the NIH template  
389 using rfMRI-to-T2w and T2w-to-template transformation matrices obtained by FLIRT and  
390 FNIRT, followed by spatial smoothing by Gaussian kernel with the full width of half maximum  
391 value of 1.0 mm. The *ex-vivo* structure image was also normalized to the NIH template using  
392 FLIRT and FNIRT.

393

#### 394 *Cortico-subcortical functional networks in marmosets*

395 The group ICA analysis was first implemented for only cortical area 10 times with different  
396 dimension numbers (from 16 to 25) to identify optimal dimensionality using MELODIC module  
397 of the FSL software package – the 20 components solution was selected to be an appropriate  
398 representative of meaningful components with reference to previous reports of marmoset  
399 functional networks (Belcher et al., 2013; Ghahremani et al., 2016; Hori et al., 2019b). Second,

400 a spatial regression approach was used to obtain the temporal dynamics for each cortical  
401 component within each scan's fMRI data sets (Filippini et al., 2009). In this process, the full set  
402 of group-ICA spatial templates were used in a linear model fit against the separate fMRI data  
403 sets. Finally, we calculated correlation coefficients between the time courses in each cortical  
404 network and the time courses in each subcortical voxel using FSL's FEAT. The functional  
405 connectivity maps (z-score maps) in the subcortical areas were then averaged across scans.  
406 To assign each subcortical voxel to one of the networks, one network having the highest z-  
407 value was assigned in each voxel.

408

#### 409 *Cortico-subcortical functional networks in humans*

410 Human connectome project (HCP) datasets were used for human analysis (Van Essen et al.,  
411 2013). RS-fMRI data for 100 subjects (4 scans for each subject, namely total 400 scans)  
412 preprocessed with the HCP functional pipeline, including motion correction, distortion  
413 correction, normalization to Montreal Neurological Institute (MNI) template space, and FMRIB's  
414 ICA-based X-noiseifier (FIX) denoising (Salimi-Khorshidi et al., 2014) were downloaded from  
415 the HCP website (<https://www.humanconnectome.org/>). Group ICA analysis was performed for  
416 only cortical areas with 20 dimensions. After that, temporal dynamics for each cortical  
417 component within each scan's data were obtained by a spatial regression approach using  
418 group ICA templates, and correlation coefficients between the time courses in each cortical  
419 network and the time courses in each subcortical voxel were calculated in the same way as in  
420 the marmoset analysis. Finally, the functional connectivity maps (z-score maps) in the  
421 subcortical areas were then averaged across scans.

422

#### 423 *Subcortical volume of interest*

424 To identify the subcortical areas associated with each marmoset network, we applied the  
425 subcortical atlas supplied by the NIH Marmoset Brain template (Liu et al., 2018), where the  
426 thalamus is not parcellated into subthalamic nuclei. Based on the ex-vivo image normalized to  
427 the NIH template, we created the subthalamic VOIs (anterior (AN), laterodorsal (LD),  
428 mediodorsal (MD), ventral anterior (VA), ventral lateral (VL), ventral posterior (VP) and



429 pulvinar) with reference to the Paxinos atlas (Paxinos et al., 2012). For human subcortical  
430 VOIs, standard mesh atlas for subcortical area supplied by HCP pipeline was used  
431 (Atlas\_ROIs\_2.nii.gz), which does not have VOIs of subthalamic nuclei, lateral geniculate  
432 nucleus (LGN), superior colliculus (SC) and inferior colliculus (IC). For thalamic nuclei, the  
433 histological-based atlas supplied by NeuroImaging and Surgical Technologies Lab was used  
434 (Xiao et al., 2015; Xiao et al., 2012). Also, a radiologist made the VOIs for LGN, SC and IC  
435 based on the MNI T1w template.

436

#### 437 *Comparison of subcortical connectivity profiles*

438 To determine whether the subcortical connectivity profiles are either similar or dissimilar from  
439 each other, we used Manhattan distance among each connectivity fingerprint (Mars et al.,  
440 2018; Mars et al., 2016). Connectivity fingerprints were created for marmosets and humans by  
441 determining the mean z-values in seven target regions placed in the caudate, putamen,  
442 hippocampus, amygdala, SC, IC, and LGN. We normalized the fingerprint to a range between  
443 0 (weakest connection with any of the target areas) and 1 (strongest connection with any of the  
444 target areas) to compare a pattern of connections with target areas, rather than absolute  
445 strength. Permutation testing was used to test the significance of the match between each of  
446 the marmoset and human subcortical network by calculating 10,000 different permutations of  
447 the fingerprint target networks in marmosets.  $p < 0.05$  is considered as significantly smaller  
448 Manhattan distance than expected chance. This analysis was performed using custom tools  
449 written in Matlab (the Mathworks, Natick, MA, USA).

450

451 **Figures**

452

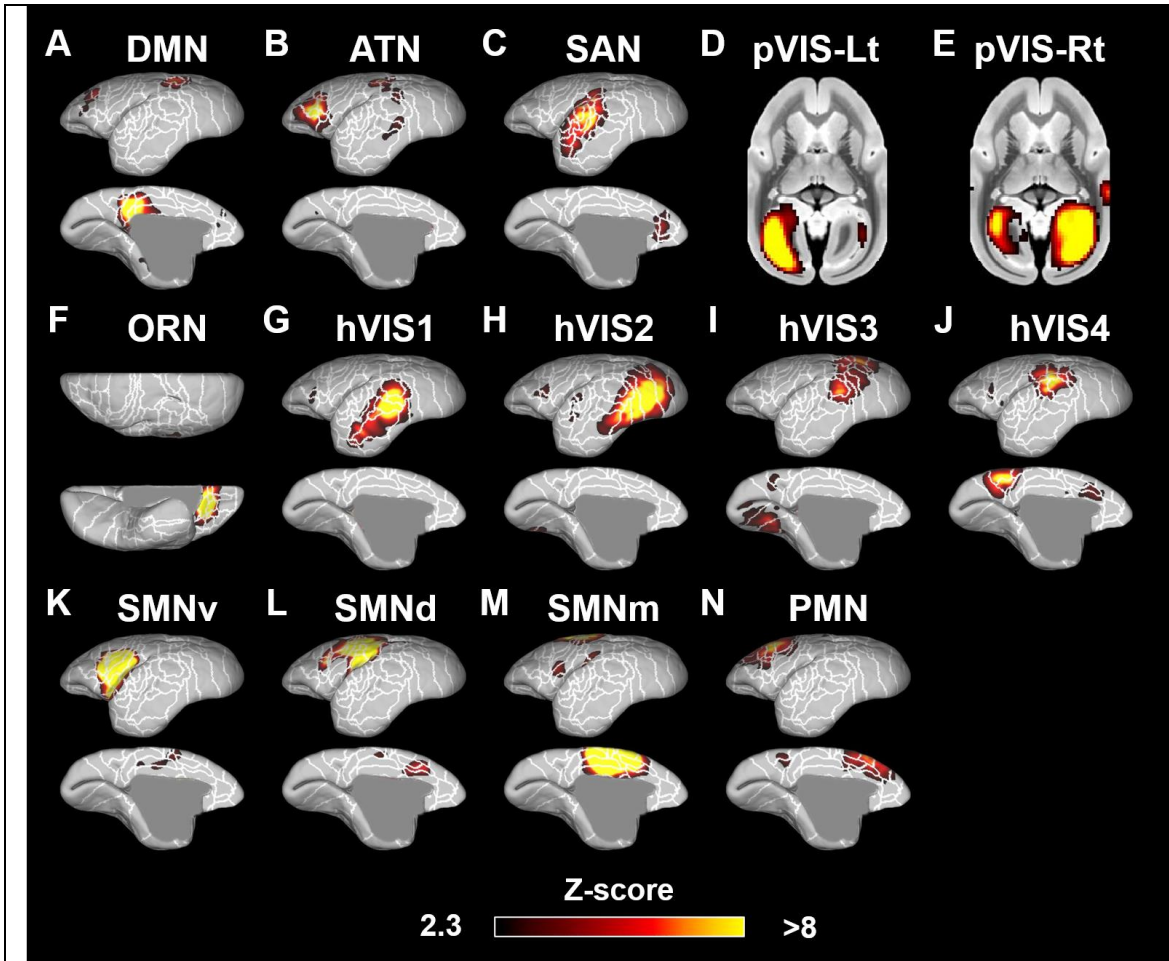

**Figure 1.** Fourteen components identified as resting-state networks in the marmosets. These networks were labeled based on previous studies (Belcher et al., 2013; Hori et al., 2020b) as follows: (A) default mode network (DMN); (B) attention network (ATN); (C) salience network (SAN); (D) left primary visual network (pVIS-Lt); (E) right primary VIS (pVIS-Rt); (F) orbitofrontal network (ORN); (G)-(J) high-order VIS (hVIS1-4); (K)-(M) somatomotor networks ventral (SMNv), dorsal (SMNd), and medial (SMNm); (N) premotor network (PMN). Color bar represents the z-score of these correlation patterns thresholding at 2.3. White lines show the cytoarchitectonic borders for reference (Liu et. al., 2018).

453

454

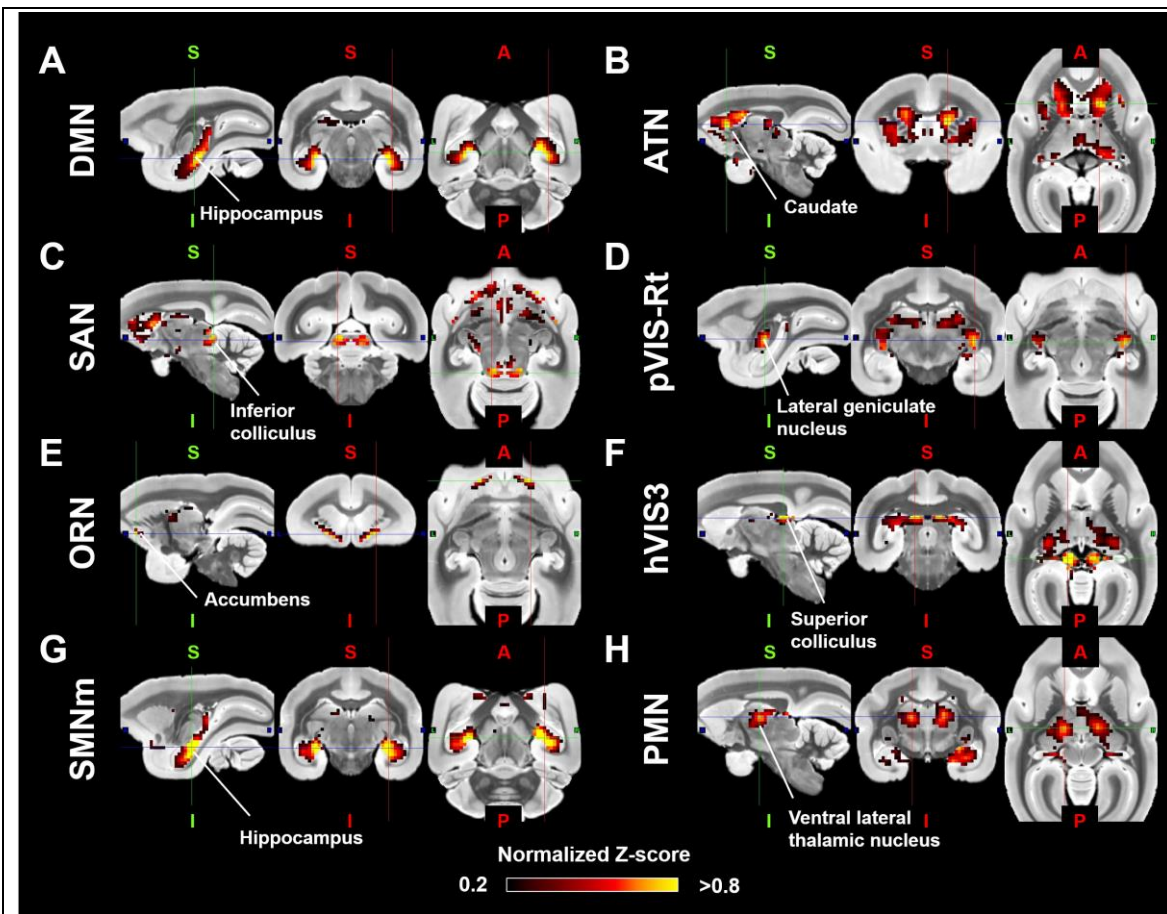

**Figure 2.** Representative subcortical z-score maps for each resting-state network (RSN). The z-score maps were normalized to be maximum z-value equal to 1, and were shown in sagittal, coronal, and axial slices deemed most representative of the activation patterns. (A) default mode network (DMN: corresponding to Fig. 1A); (B) attention network (ATN: corresponding to Fig. 1B); (C) salience network (SAN: corresponding to Fig. 1C); (D) primary visual network (pVIS: corresponding to Fig. 1E); (E) orbitofrontal network (ORN: corresponding to Fig. 1F); (F) high-order VIS (corresponding to Fig. 1I); (G) somatomotor network (SMN) medial sensory part (corresponding to Fig. 1M); (H) premotor network (PMN) (corresponding to Fig. 1N).

455

456

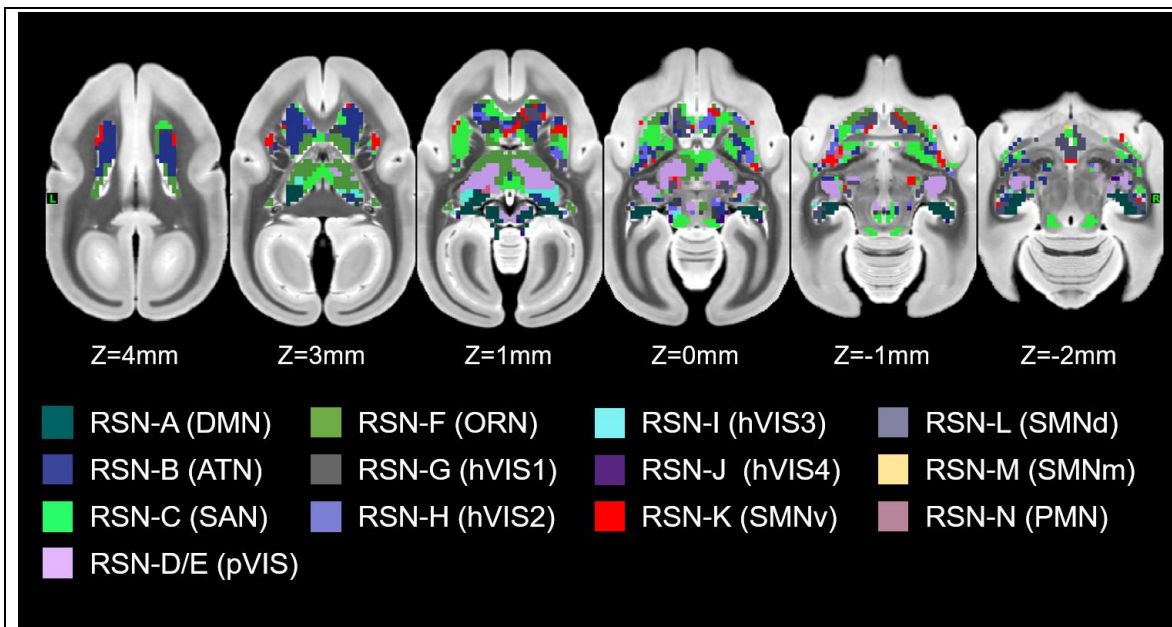

**Figure 3.** A parcellation of the marmoset subcortical area. The network with the highest z-value among all networks was assigned as the main network related to the voxel. The colors on the surfaces and volumes are corresponding to the name of networks in Figure 1.

457

458

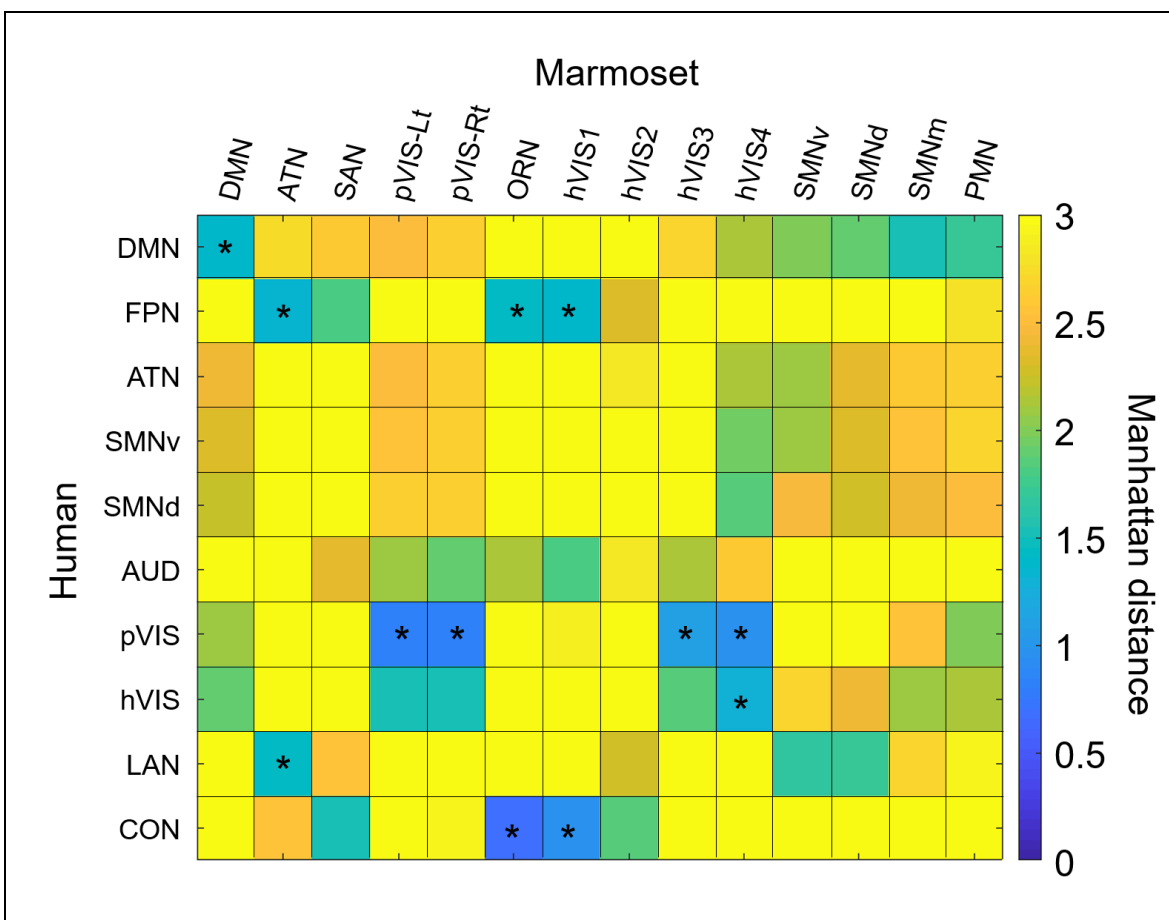

**Figure 4.** The similarity of subcortical network patterns between marmosets and humans. Manhattan distance between these species were plotted in matrix form. Significant similarities were marked by an asterisk within the matrix.

459

460

461

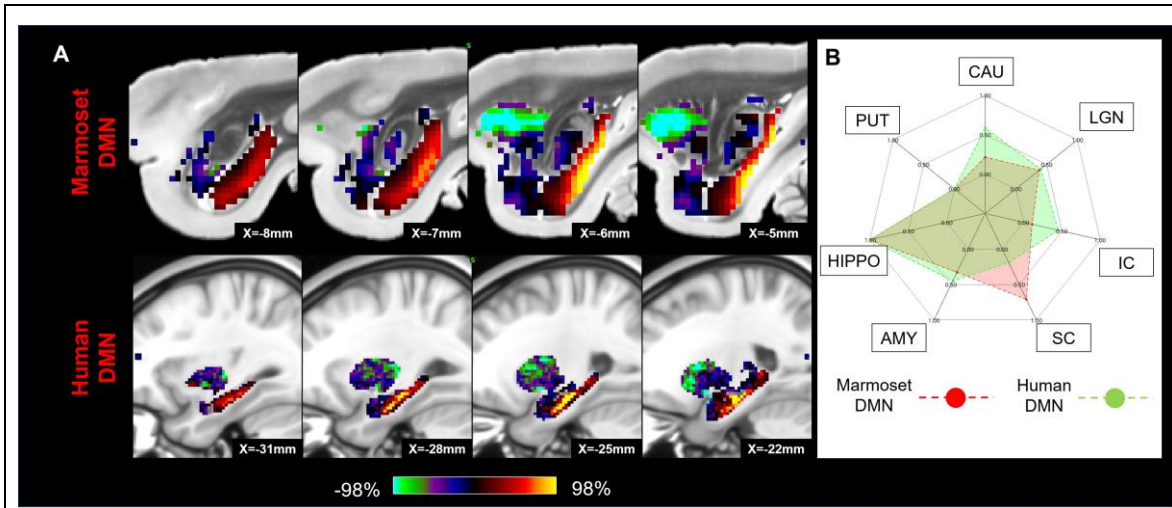

**Figure 5.** Matching human default mode network (DMN) to marmoset DMN in subcortical areas. (A) Z-score maps were shown in sagittal slices focused on the hippocampus, which has the strongest connections in both species. A single-color palette applies to all two species, but is scaled according to percentile ranges within each species rather than to absolute values. (B) A fingerprint shows the matching connectivity patterns between marmosets and humans. Red and green areas indicate marmoset and human fingerprints, respectively.

CAU: caudate; PUT: putamen; HIPPO: hippocampus; AMY: amygdala; SC: superior colliculus; IC: inferior colliculus; LGN: lateral geniculate nucleus.

462

463

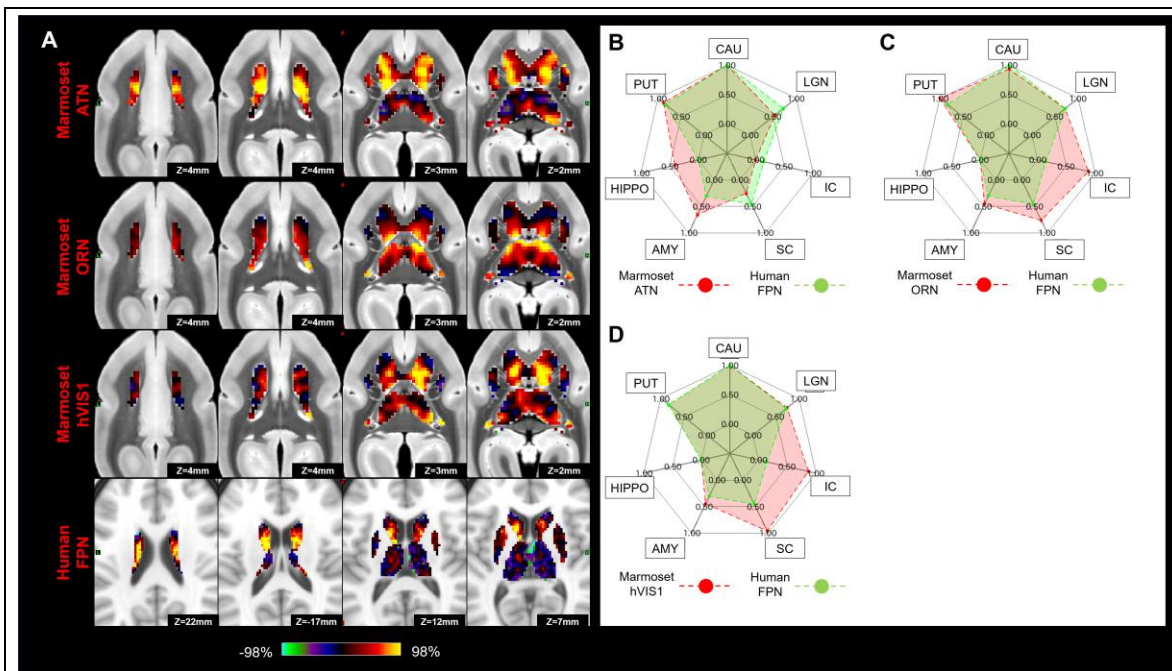

**Figure 6.** Matching human frontoparietal network (FPN) to marmoset attention (ATN), orbitofrontal (ORN), and high-order visual networks (hVIS1) in subcortical area. (A) Z-score maps were shown in axial slices focused on the caudate, which has the strongest connections in both species. A single-color palette applies to all two species, but is scaled according to percentile ranges within each species rather than to absolute values. (B-D) Fingerprints show the matching connectivity patterns between marmosets and humans. Red and green areas indicate marmoset and human fingerprints, respectively. CAU: caudate; PUT: putamen; HIPPO: hippocampus; AMY: amygdala; SC: superior colliculus; IC: inferior colliculus; LGN: lateral geniculate nucleus.

464

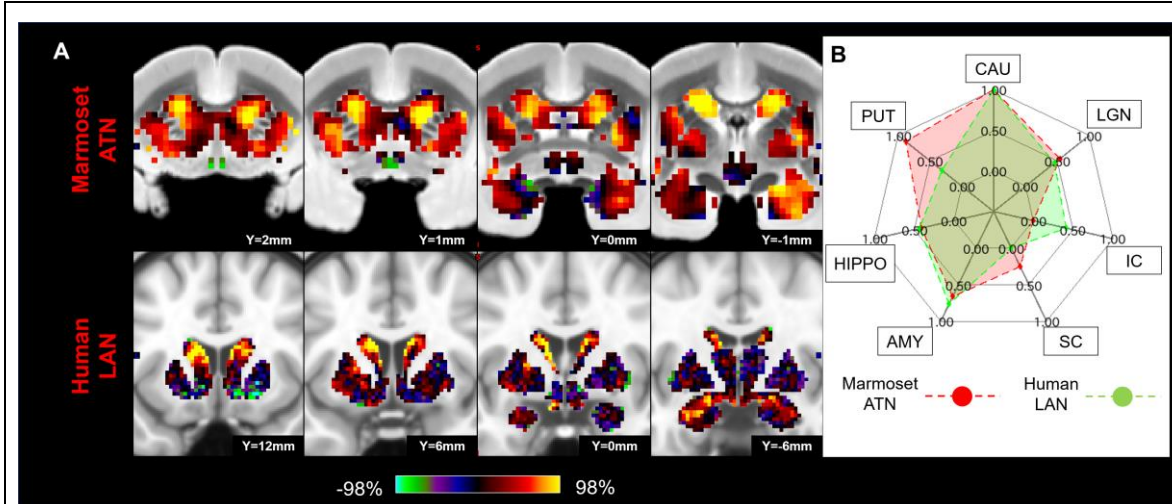

**Figure 7.** Matching human language network (LAN) to marmoset attention network (ATN) in subcortical area. (A) Z-score maps were shown in coronal slices focused on the caudate and amygdala, which have strong connections in both species. A single-color palette applies to all two species, but is scaled according to percentile ranges within each species rather than to absolute values. (B) Fingerprint shows the matching connectivity pattern between marmosets and humans. Red and green areas indicate marmoset and human fingerprints, respectively.

CAU: caudate; PUT: putamen; HIPPO: hippocampus; AMY: amygdala; SC: superior colliculus; IC: inferior colliculus; LGN: lateral geniculate nucleus.



466

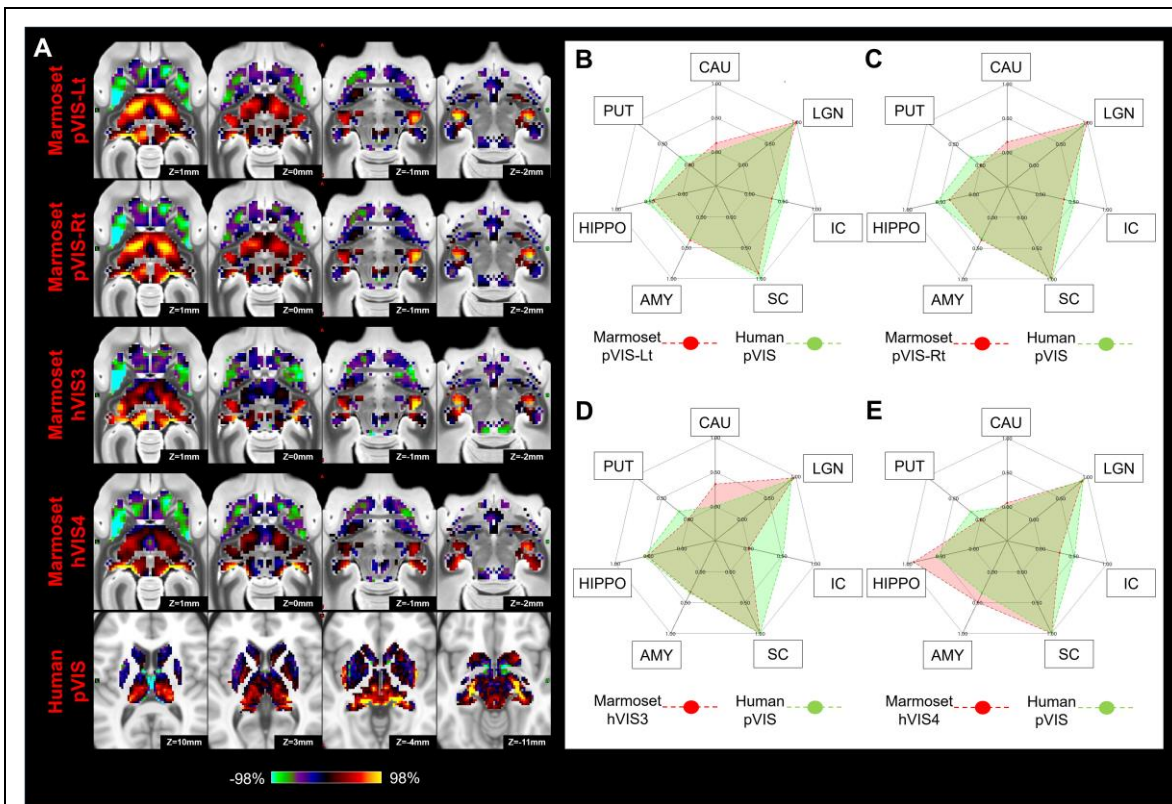

**Figure 8.** Matching human primary visual network (pVIS) to marmoset VISs (pVIS-Lt, pVIS-Rt, hVIS3, and hVIS4) in subcortical area. (A) Z-score maps for each were shown in axial slices focused on the superior colliculus and lateral geniculate nucleus, which have strong connections in both species. A single-color palette applies to all two species, but is scaled according to percentile ranges within each species rather than to absolute values. (B-E) Fingerprints show the matching connectivity patterns between marmosets and humans. Red and green areas indicate marmoset and human fingerprints, respectively. CAU: caudate; PUT: putamen; HIPPO: hippocampus; AMY: amygdala; SC: superior colliculus; IC: inferior colliculus; LGN: lateral geniculate nucleus.

467

468

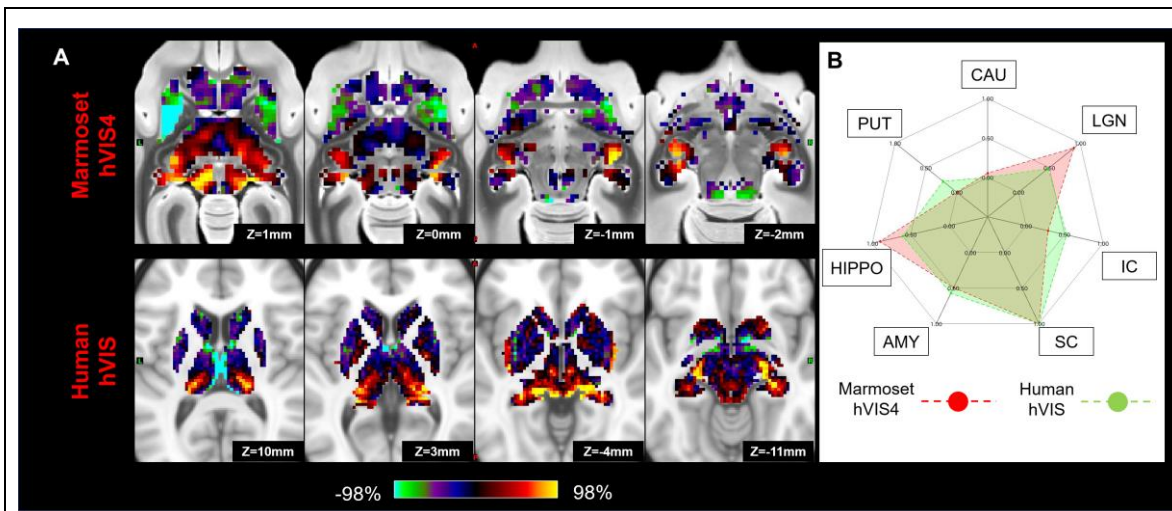

**Figure 9.** Matching human secondary visual network (hVIS) to marmoset high-order visual network (hVIS4) in subcortical area. (A) Z-score maps were shown in axial slices focused on the superior colliculus and lateral geniculate nucleus, which have strong connections in both species. A single-color palette applies to all two species, but is scaled according to percentile ranges within each species rather than to absolute values. (B) A fingerprint shows the matching connectivity patterns between marmosets and humans. Red and green areas indicate marmoset and human fingerprints, respectively.

CAU: caudate; PUT: putamen; HIPPO: hippocampus; AMY: amygdala; SC: superior colliculus; IC: inferior colliculus; LGN: lateral geniculate nucleus.

469

470

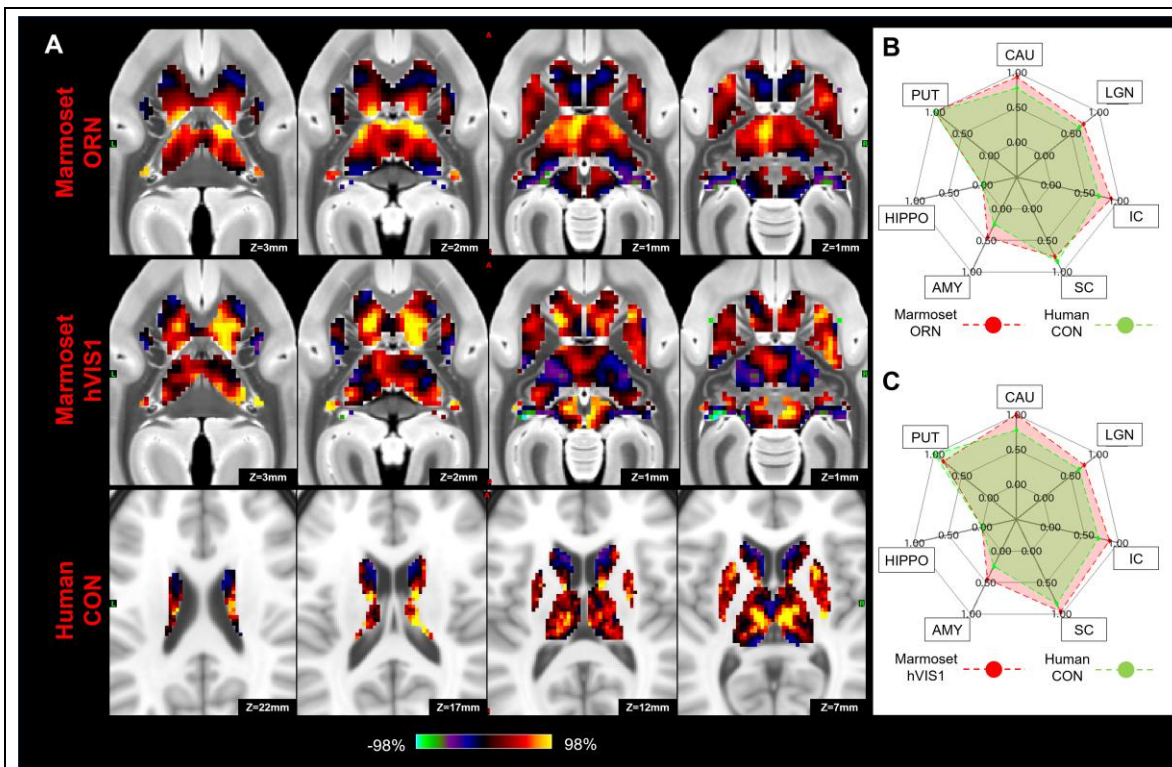

**Figure 10.** Matching human cingulo-opercular network (CON) to marmoset orbitofrontal (ORN) and high-order visual networks (hVIS1) in subcortical area. (A) Z-score maps were shown in axial slices focused on the caudate and putamen, which have strong connections in both species. A single-color palette applies to all two species, but is scaled according to percentile ranges within each species rather than to absolute values. (B, C) Fingerprints show the matching connectivity patterns between marmosets and humans. Red and green areas indicate marmoset and human fingerprints, respectively. CAU: caudate; PUT: putamen; HIPPO: hippocampus; AMY: amygdala; SC: superior colliculus; IC: inferior colliculus; LGN: lateral geniculate nucleus.

471

472 **Supplementary Figure**

473

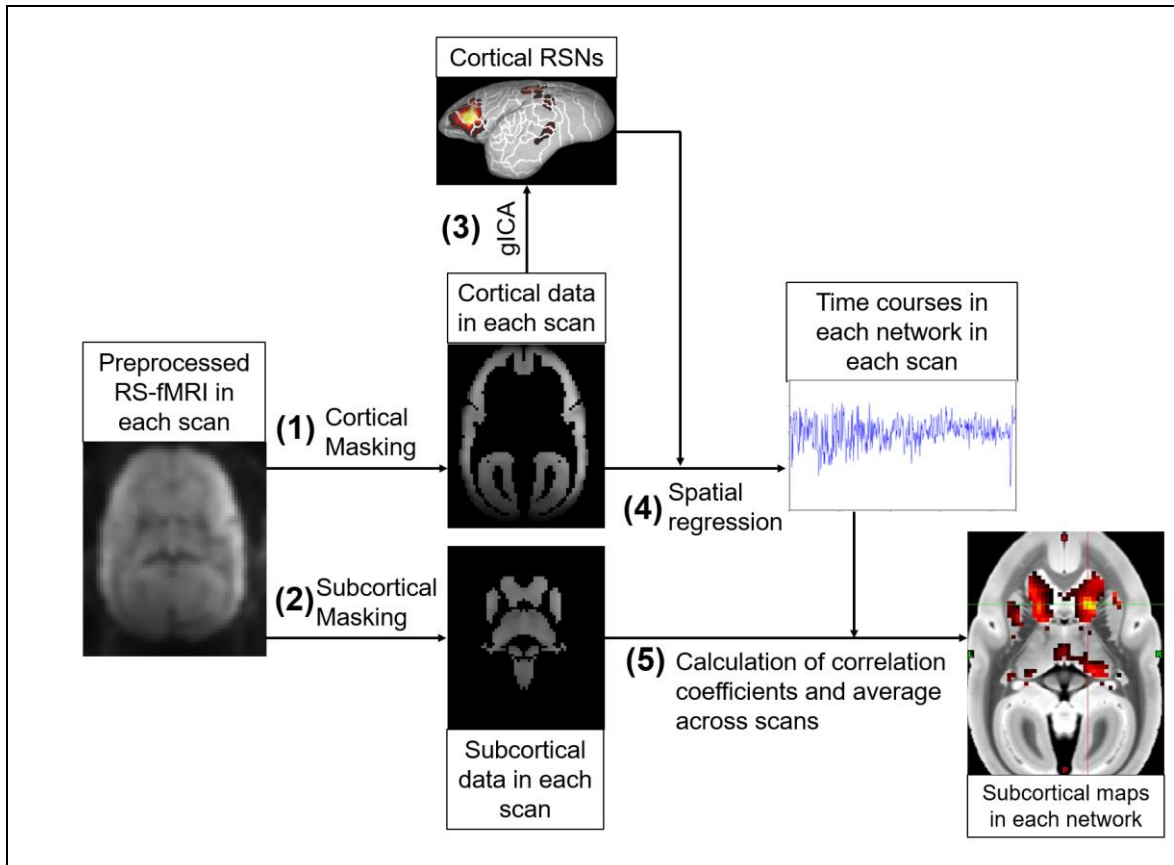

**Supplementary Figure 1.** Flow chart of analysis to calculate the subcortical connectivity maps. Each RS-fMRI scan was preprocessed, and (1) cortical and (2) subcortical regions were extracted using masks. (3) Using all cortical RS-fMRI datasets, group ICA (gICA) was performed so that 14 and 10 cortical resting-state networks (RSNs) were identified for marmosets and humans, respectively. (4) The time courses of each network in each scan were calculated using spatial regression technique and obtained cortical RSNs, (5) then correlation coefficients between the time courses in each cortical network and the time courses in each subcortical voxel were calculated. Obtained correlation coefficient maps in each network were averaged across scans.

474

475

476

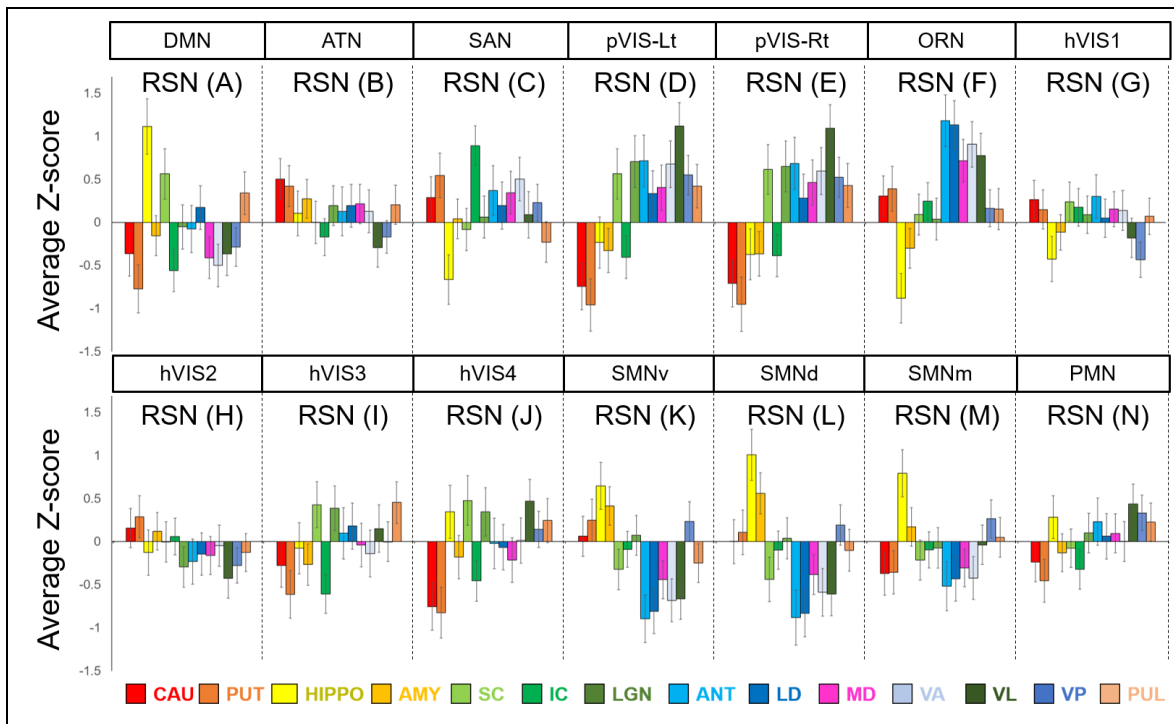

**Supplementary Figure 2.** Mean z-score values in each subcortical area in each marmoset resting-state network (RSN). The error bars represent the standard error of the mean. The RSNs described here are corresponding to those in Fig. 1. CAU: caudate; PUT: putamen; HIPPO: hippocampus; AMY: amygdala; SC: superior colliculus; IC: inferior colliculus; LGN: lateral geniculate nucleus; ANT: anterior part of thalamic nucleus; LD: laterodorsal thalamic nucleus; MD: mediodorsal thalamic nucleus; VA: ventral anterior thalamic nucleus; VL: ventral lateral thalamic nucleus; VP: ventral posterior thalamic nucleus; PUL: pulvinar nucleus.

477

478

479

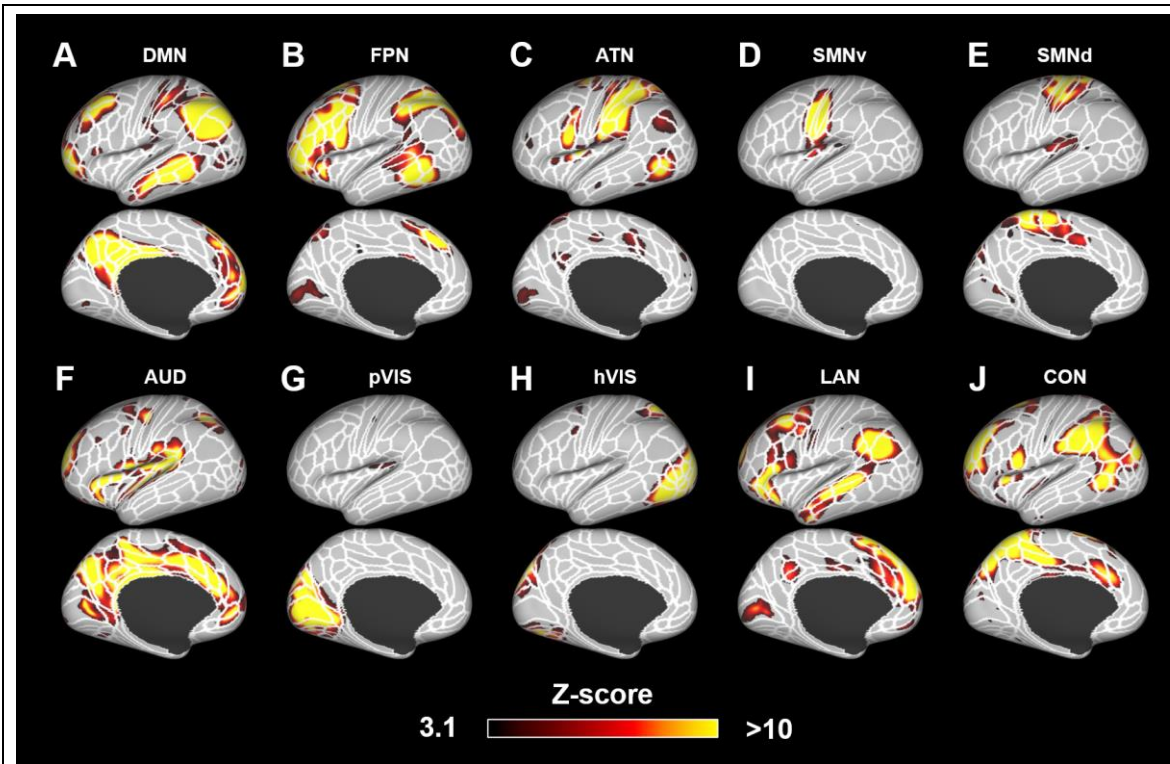

**Supplementary Figure 3.** Ten components identified as resting-state networks in humans.

These networks were labeled based on a previous study (Ji et. al., 2019) as follows: (A) default mode network (DMN); (B) frontoparietal network (FPN); (C) attention network (ATN); (D) somatomotor network ventral part (SMN1); (E) SMN dorsomedial part (SMN2); (F) auditory network (AUD); (G) primary visual network (pVIS); (H) high-order VIS (hVIS); (I) language network (LAN); (J) cingulo-opercular network (CON). Color bar represents the z-score of these correlation patterns thresholding at 3.1. White lines show the parcellation borders created based on the multimodal magnetic resonance images from Human Connectome Project (Glasser et al., 2016).

480

481

482

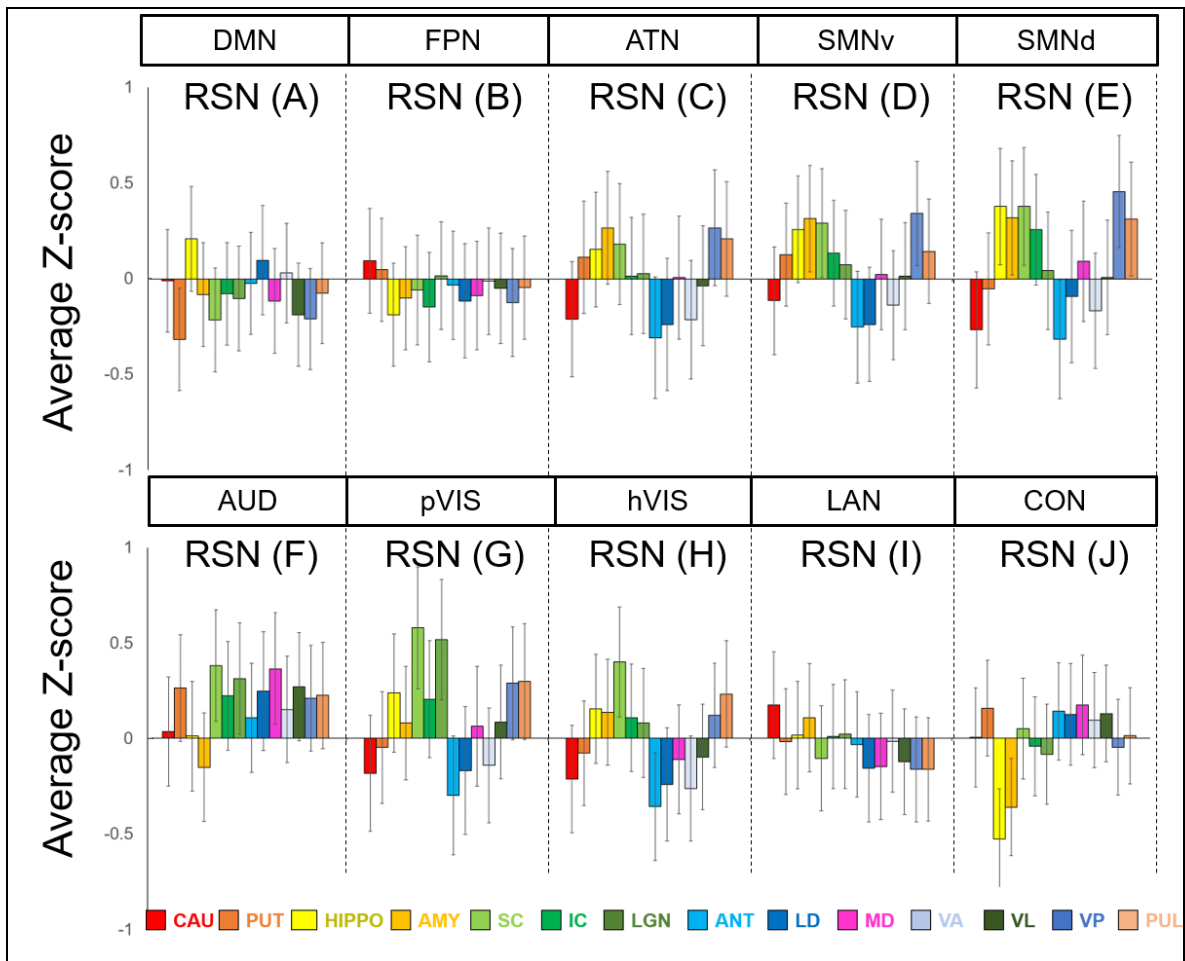

**Supplementary Figure 4.** Mean z-score values in each subcortical area in each human resting-state network (RSN). The error bars represent the standard error of the mean. The RSNs described here are corresponding to those in Supplementary fig. 2. CAU: caudate; PUT: putamen; HIPPO: hippocampus; AMY: amygdala; SC: superior colliculus; IC: inferior colliculus; LGN: lateral geniculate nucleus; ANT: anterior part of thalamic nucleus; LD: laterodorsal thalamic nucleus; MD: mediodorsal thalamic nucleus; VA: ventral anterior thalamic nucleus; VL: ventral lateral thalamic nucleus; VP: ventral posterior thalamic nucleus; PUL: pulvinar nucleus.

483

484

485 **Reference**

486

487 Abe H, Tani T, Mashiko H, Kitamura N, Hayami T, Watanabe S, Sakai K, Suzuki W, Mizukami H,  
488 Watakabe A, Yamamori T, Ichinohe N. 2018. Axonal Projections From the Middle  
489 Temporal Area in the Common Marmoset. *Frontiers in Neuroanatomy* **12**:89  
490 doi:10.3389/fnana.2018.00089

491 Balsters JH, Zerbi V, Sallet J, Wenderoth N, Mars RB. 2020. Primate homologs of mouse cortico-  
492 striatal circuits. *eLife* **9**:e53680. doi:10.7554/eLife.53680

493 Beckmann CF, Smith SM. 2004. Probabilistic Independent Component Analysis for Functional  
494 Magnetic Resonance Imaging. *IEEE Trans Med Imaging* **23**:137–152.  
495 doi:10.1109/TMI.2003.822821

496 Belcher AM, Yen CC, Stepp H, Gu H, Lu H, Yang Y, Silva AC, Stein EA. 2013. Large-Scale Brain  
497 Networks in the Awake, Truly Resting Marmoset Monkey. *Journal of Neuroscience*  
498 **33**:16796–16804. doi:10.1523/JNEUROSCI.3146-13.2013

499 Brysch W, Brysch I, Creutzfeldt OD, Schlingensiepen R. 1990. The topology of the thalamo-  
500 cortical projections in the marmoset monkey (*CMLithrixjacchus*). *Experimental Brain*  
501 *Research* **17**.

502 Burman KJ, Bakola S, Richardson KE, Yu H-H, Reser DH, Rosa MGP. 2015. Cortical and  
503 thalamic projections to cytoarchitectural areas 6Va and 8C of the marmoset monkey:  
504 Connectionally distinct subdivisions of the lateral premotor cortex: connections of  
505 marmoset lateral premotor cortex. *Journal of Comparative Neurology* **523**:1222–1247.  
506 doi:10.1002/cne.23734

507 Cléry JC, Schaeffer DJ, Hori Y, Gilbert KM, Hayrynen LK, Gati JS, Menon RS, Everling S. 2020.  
508 Looming and receding visual networks in awake marmosets investigated with fMRI.  
509 *NeuroImage* **215**:116815. doi:10.1016/j.neuroimage.2020.116815

510 Corbetta M, Akbudak E, Conturo TE, Snyder AZ, Ollinger JM, Drury HA, Linenweber MR,  
511 Petersen SE, Raichle ME, Van Essen DC, Shulman GL. 1998. A Common Network of  
512 Functional Areas for Attention and Eye Movements. *Neuron* **21**:761–773.  
513 doi:10.1016/S0896-6273(00)80593-0



- 514 Dosenbach NUF, Fair DA, Miezin FM, Cohen AL, Wenger KK, Dosenbach RAT, Fox MD, Snyder  
515 AZ, Vincent JL, Raichle ME, Schlaggar BL, Petersen SE. 2007. Distinct brain networks  
516 for adaptive and stable task control in humans. *Proceedings of the National Academy of  
517 Sciences* **104**:11073–11078. doi:10.1073/pnas.0704320104
- 518 Dosenbach NUF, Visscher KM, Palmer ED, Miezin FM, Wenger KK, Kang HC, Burgund ED,  
519 Grimes AL, Schlaggar BL, Petersen SE. 2006. A Core System for the Implementation of  
520 Task Sets. *Neuron* **50**:799–812. doi:10.1016/j.neuron.2006.04.031
- 521 Filippini N, MacIntosh BJ, Hough MG, Goodwin GM, Frisoni GB, Smith SM, Matthews PM,  
522 Beckmann CF, Mackay CE. 2009. Distinct patterns of brain activity in young carriers of  
523 the APOE- 4 allele. *Proceedings of the National Academy of Sciences* **106**:7209–7214.  
524 doi:10.1073/pnas.0811879106
- 525 Ghahremani M, Hutchison RM, Menon RS, Everling S. 2016. Frontoparietal Functional  
526 Connectivity in the Common Marmoset. *Cerebral Cortex* **27**:3890–3905.  
527 doi:10.1093/cercor/bhw198
- 528 Ghahremani M, Johnston KD, Ma L, Hayrynen LK, Everling S. 2019. Electrical microstimulation  
529 evokes saccades in posterior parietal cortex of common marmosets. *Journal of  
530 Neurophysiology* **122**:1765–1776. doi:10.1152/jn.00417.2019
- 531 Glasser MF, Coalson TS, Robinson EC, Hacker CD, Harwell J, Yacoub E, Ugurbil K, Andersson  
532 J, Beckmann CF, Jenkinson M, Smith SM, Van Essen DC. 2016. A multi-modal  
533 parcellation of human cerebral cortex. *Nature* **536**:171–178. doi:10.1038/nature18933
- 534 Greicius MD, Srivastava G, Reiss AL, Menon V. 2004. Default-mode network activity  
535 distinguishes Alzheimer’s disease from healthy aging: Evidence from functional MRI.  
536 *Proceedings of the National Academy of Sciences* **101**:4637–4642.  
537 doi:10.1073/pnas.0308627101
- 538 Griffanti L, Douaud G, Bijsterbosch J, Evangelisti S, Alfaro-Almagro F, Glasser MF, Duff EP,  
539 Fitzgibbon S, Westphal R, Carone D, Beckmann CF, Smith SM. 2017. Hand classification  
540 of fMRI ICA noise components. *NeuroImage* **154**:188–205.  
541 doi:10.1016/j.neuroimage.2016.12.036

- 542 Handler WB, Bindseil G, Chaddock R, Dalrymple B, Gati JS, Gilbert KM, Harris C, Klassen LM,  
543 Peterson J, Van Sas F, Chronik BA. 2020. Design and construction of a gradient coil for  
544 high resolution marmoset imaging. *Biomedical Physics and Engineering Express*.  
545 doi:10.1088/2057-1976/ab8d97
- 546 Hikosaka O, Wurtz RH. 1989. The basal ganglia. *Reviews of Oculomotor Research* **3**:257-281
- 547 Hori Y, Schaeffer DJ, Gilbert KM, Hayrynen LK, Cléry JC, Gati JS, Menon RS, Everling S. 2020a.  
548 Comparison of resting-state functional connectivity in marmosets with tracer-based  
549 cellular connectivity. *NeuroImage* **204**:116241. doi:10.1016/j.neuroimage.2019.116241
- 550 Hori Y, Schaeffer DJ, Gilbert KM, Hayrynen LK, Cléry JC, Gati JS, Menon RS, Everling S. 2020b.  
551 Altered Resting-State Functional Connectivity Between Awake and Isoflurane  
552 Anesthetized Marmosets. *Cerebral Cortex* bhaa168. doi:10.1093/cercor/bhaa168
- 553 Hung CC, Yen CC, Ciuchta JL, Papoti D, Bock NA, Leopold DA, Silva AC. 2015a. Functional  
554 MRI of visual responses in the awake, behaving marmoset. *NeuroImage* **120**:1–11.  
555 doi:10.1016/j.neuroimage.2015.06.090
- 556 Hung CC, Yen CC, Ciuchta JL, Papoti D, Bock NA, Leopold DA, Silva AC. 2015b. Functional  
557 Mapping of Face-Selective Regions in the Extrastriate Visual Cortex of the Marmoset.  
558 *Journal of Neuroscience* **35**:1160–1172. doi:10.1523/JNEUROSCI.2659-14.2015
- 559 Hutchison RM, Gallivan JP, Culham JC, Gati JS, Menon RS, Everling S. 2012. Functional  
560 connectivity of the frontal eye fields in humans and macaque monkeys investigated with  
561 resting-state fMRI. *Journal of Neurophysiology* **107**:2463–2474.  
562 doi:10.1152/jn.00891.2011
- 563 Ji JL, Spronk M, Kulkarni K, Repovš G, Anticevic A, Cole MW. 2019. Mapping the human brain's  
564 cortical-subcortical functional network organization. *NeuroImage* **185**:35–57.  
565 doi:10.1016/j.neuroimage.2018.10.006
- 566 Johnston KD, Barker K, Schaeffer L, Schaeffer DJ, Everling S. 2018. Methods for chair  
567 restraint and training of the common marmoset on oculomotor tasks. *J. Neurophysiol.*  
568 **119**:1636–1646. doi: 10.1152/jn.00866.2017.

- 569 Kaas JH, Lyon DC. 2007. Pulvinar contributions to the dorsal and ventral streams of visual  
570 processing in primates. *Brain Research Reviews* **55**:285–296.  
571 doi:10.1016/j.brainresrev.2007.02.008
- 572 Li X, Morgan PS, Ashburner J, Smith J, Rorden C. 2016. The first step for neuroimaging data  
573 analysis: DICOM to NIfTI conversion. *Journal of Neuroscience Methods* **264**:47–56.  
574 doi:10.1016/j.jneumeth.2016.03.001
- 575 Liu C, Ye FQ, Newman JD, Szczupak D, Tian X, Yen CC-C, Majka P, Glen D, Rosa MGP, Leopold  
576 DA, Silva AC. 2020. A resource for the detailed 3D mapping of white matter pathways in  
577 the marmoset brain. *Nature Neuroscience* **23**:271–80 doi:10.1038/s41593-019-0575-0
- 578 Liu C, Ye FQ, Yen CC-C, Newman JD, Glen D, Leopold DA, Silva AC. 2018. A digital 3D atlas of  
579 the marmoset brain based on multi-modal MRI. *NeuroImage* **169**:106–116.  
580 doi:10.1016/j.neuroimage.2017.12.004
- 581 Lu H, Zou Q, Gu H, Raichle ME, Stein EA, Yang Y. 2012. Rat brains also have a default mode  
582 network. *Proceedings of the National Academy of Sciences* **109**:3979–3984.  
583 doi:10.1073/pnas.1200506109
- 584 Luna B, Thulborn K, Strojwas M, McCurtain B, Berman R, Genovese C, Sweeney J. 1998. Dorsal  
585 cortical regions subserving visually guided saccades in humans: an fMRI study. *Cerebral*  
586 *Cortex* **8**:40–47. doi:10.1093/cercor/8.1.40
- 587 Ma L, Selvanayagam J, Ghahremani M, Hayrynen LK, Johnston KD, Everling S. 2020. Single-  
588 unit activity in marmoset posterior parietal cortex in a gap saccade task. *Journal of*  
589 *Neurophysiology* **123**:896–911. doi:10.1152/jn.00614.2019
- 590 Majka P, Bai S, Bakola S, Bednarek S, Chan JM, Jermakow N, Passarelli L, Reser DH, Theodoni  
591 P, Worthy KH, Wang X-J, Wójcik DK, Mitra PP, Rosa MGP. 2020. Open access resource  
592 for cellular-resolution analyses of corticocortical connectivity in the marmoset monkey.  
593 *Nature Communications* **11**:1133. doi:10.1038/s41467-020-14858-0
- 594 Majka P, Chaplin TA, Yu H-H, Tolpygo A, Mitra PP, Wójcik DK, Rosa MGP. 2016. Towards a  
595 comprehensive atlas of cortical connections in a primate brain: Mapping tracer injection  
596 studies of the common marmoset into a reference digital template: Atlas of primate brain

- 597 cortical connections. *Journal of Comparative Neurology* **524**:2161–2181.  
598 doi:10.1002/cne.24023
- 599 Mantini D, Gerits A, Nelissen K, Durand J-B, Joly O, Simone L, Sawamura H, Wardak C, Orban  
600 GA, Buckner RL. 2011. Default mode of brain function in monkeys. *Journal of*  
601 *Neuroscience* **31**:12954–12962.
- 602 Mars RB, Passingham RE, Jbabdi S. 2018. Connectivity Fingerprints: From Areal Descriptions  
603 to Abstract Spaces. *Trends in Cognitive Sciences* **22**:1026–1037.  
604 doi:10.1016/j.tics.2018.08.009
- 605 Mars RB, Verhagen L, Gladwin TE, Neubert F-X, Sallet J, Rushworth MFS. 2016. Comparing  
606 brains by matching connectivity profiles. *Neuroscience & Biobehavioral Reviews* **60**:90–  
607 97. doi:10.1016/j.neubiorev.2015.10.008
- 608 McDonald JS, Clifford CWG, Solomon SS, Chen SC, Solomon SG. 2014. Integration and  
609 segregation of multiple motion signals by neurons in area MT of primate. *Journal of*  
610 *Neurophysiology* **111**:369–378. doi:10.1152/jn.00254.2013
- 611 Miller CT, Thomas AW, Nummela SU, de la Mothe LA. 2015. Responses of primate frontal cortex  
612 neurons during natural vocal communication. *Journal of Neurophysiology* **114**:1158–  
613 1171. doi:10.1152/jn.01003.2014
- 614 Mitchell JF, Leopold DA. 2015. The marmoset monkey as a model for visual neuroscience.  
615 *Neuroscience Research* **93**:20–46. doi:10.1016/j.neures.2015.01.008
- 616 Okano H, Mitra P. 2015. Brain-mapping projects using the common marmoset. *Neuroscience*  
617 *Research* **93**:3–7. doi:10.1016/j.neures.2014.08.014
- 618 Okano H, Sasaki E, Yamamori T, Iriki A, Shimogori T, Yamaguchi Y, Kasai K, Miyawaki A. 2016.  
619 Brain/MINDS: A Japanese National Brain Project for Marmoset Neuroscience. *Neuron*  
620 **92**:582–590. doi:10.1016/j.neuron.2016.10.018
- 621 Park JE, Zhang XF, Choi S-H, Okahara J, Sasaki E, Silva AC. 2016. Generation of transgenic  
622 marmosets expressing genetically encoded calcium indicators. *Scientific Reports* **6**.  
623 doi:10.1038/srep34931
- 624 Passingham RE, Stephan KE, Kötter R. 2002. The anatomical basis of functional localization in  
625 the cortex. *Nature Reviews Neuroscience* **3**:606–616. doi:10.1038/nrn893

- 626 Paxinos G., Watson C., Petrides M., Rosa M., Tokuno H. 2012. The Marmoset Brain in  
627 Stereotaxic Coordinates. Academic Press <http://hdl.handle.net/20.500.11937/40725>.
- 628 Phillips JM, Everling S. 2012. Neural Activity in the Macaque Putamen Associated with Saccades  
629 and Behavioral Outcome. *PLoS ONE* **7**:e51596. doi:10.1371/journal.pone.0051596
- 630 Raemaekers M, Jansma JM, Cahn W, Van der Geest JN, van der Linden JA, Kahn RS, Ramsey  
631 NF. 2002. Neuronal Substrate of the Saccadic Inhibition Deficit in Schizophrenia  
632 Investigated With 3-Dimensional Event-Related Functional Magnetic Resonance  
633 Imaging. *Archives of General Psychiatry* **59**:313–320. doi:10.1001/archpsyc.59.4.313
- 634 Raemaekers M, Ramsey NF, Vink M, van den Heuvel MP, Kahn RS. 2006. Brain Activation  
635 During Antisaccades in Unaffected Relatives of Schizophrenic Patients. *Biological*  
636 *Psychiatry* **59**:530–535. doi:10.1016/j.biopsych.2005.07.030
- 637 Reser DH, Burman KJ, Yu H-H, Chaplin TA, Richardson KE, Worthy KH, Rosa MGP. 2013.  
638 Contrasting Patterns of Cortical Input to Architectural Subdivisions of the Area 8  
639 Complex: A Retrograde Tracing Study in Marmoset Monkeys. *Cerebral Cortex* **23**:1901–  
640 1922. doi:10.1093/cercor/bhs177
- 641 Salimi-Khorshidi G, Douaud G, Beckmann CF, Glasser MF, Griffanti L, Smith SM. 2014.  
642 Automatic denoising of functional MRI data: Combining independent component analysis  
643 and hierarchical fusion of classifiers. *NeuroImage* **90**:449–468.  
644 doi:10.1016/j.neuroimage.2013.11.046
- 645 Sasaki E, Suemizu H, Shimada A, Hanazawa K, Oiwa R, Kamioka M, Tomioka I, Sotomaru Y,  
646 Hirakawa R, Eto T, Shiozawa S, Maeda T, Ito M, Ito R, Kito C, Yagihashi C, Kawai K,  
647 Miyoshi H, Tanioka Y, Tamaoki N, Habu S, Okano H, Nomura T. 2009. Generation of  
648 transgenic non-human primates with germline transmission. *Nature* **459**:523–527.  
649 doi:10.1038/nature08090
- 650 Schaeffer DJ, Adam R, Gilbert KM, Gati JS, Li AX, Menon RS, Everling S. 2017. Diffusion-  
651 weighted tractography in the common marmoset monkey at 9.4T. *Journal of*  
652 *Neurophysiology* **118**:1344–1354. doi:10.1152/jn.00259.2017

- 653 Schaeffer DJ, Gilbert KM, Gati JS, Menon RS, Everling S. 2019a. Intrinsic Functional Boundaries  
654 of Lateral Frontal Cortex in the Common Marmoset Monkey. *The Journal of*  
655 *Neuroscience* **39**:1020–1029. doi:10.1523/JNEUROSCI.2595-18.2018
- 656 Schaeffer DJ, Gilbert KM, Ghahremani M, Gati JS, Menon RS, Everling S. 2019b. Intrinsic  
657 functional clustering of anterior cingulate cortex in the common marmoset. *NeuroImage*  
658 **186**:301–307. doi:10.1016/j.neuroimage.2018.11.005
- 659 Schaeffer DJ, Gilbert KM, Hori Y, Gati JS, Menon RS, Everling S. 2019c. Integrated  
660 radiofrequency array and animal holder design for minimizing head motion during awake  
661 marmoset functional magnetic resonance imaging. *NeuroImage* **193**:126–138.  
662 doi:10.1016/j.neuroimage.2019.03.023
- 663 Schaeffer DJ, Gilbert KM, Hori Y, Hayrynen LK, Johnston KD, Gati JS, Menon RS, Everling S.  
664 2019d. Task-based fMRI of a free-viewing visuo-saccadic network in the marmoset  
665 monkey. *NeuroImage* **202**:116147. doi:10.1016/j.neuroimage.2019.116147
- 666 Schaeffer DJ, Hori Y, Gilbert KM, Gati JS, Menon RS, Everling S. 2020. Divergence of rodent  
667 and primate medial frontal cortex functional connectivity. *Proceedings of the National*  
668 *Academy of Sciences in press*
- 669 Selvanayagam J, Johnston KD, Schaeffer DJ, Hayrynen LK, Everling S. 2019. Functional  
670 Localization of the Frontal Eye Fields in the Common Marmoset Using Microstimulation.  
671 *Journal of Neuroscience* **39**:9197–9206. doi:10.1523/JNEUROSCI.1786-19.2019
- 672 Sheffield JM, Repovs G, Harms MP, Carter CS, Gold JM, MacDonald III AW, Daniel Ragland J,  
673 Silverstein SM, Godwin D, Barch DM. 2015. Fronto-parietal and cingulo-opercular  
674 network integrity and cognition in health and schizophrenia. *Neuropsychologia* **73**:82–  
675 93. doi:10.1016/j.neuropsychologia.2015.05.006
- 676 Silva AC, Liu JV, Hirano Y, Leoni RF, Merkle H, Mackel JB, Zhang XF, Nascimento GC,  
677 Stefanovic B. 2011. Longitudinal functional magnetic resonance imaging in animal  
678 models. *Methods Mol Biol.* **711**:281–302.
- 679 Smith SM. 2002. Fast robust automated brain extraction. *Human Brain Mapping* **17**:143–155.  
680 doi:10.1002/hbm.10062

- 681 Smith SM, Jenkinson M, Woolrich MW, Beckmann CF, Behrens TEJ, Johansen-Berg H,  
682 Bannister PR, De Luca M, Drobnjak I, Flitney DE, Niazy RK, Saunders J, Vickers J,  
683 Zhang Y, De Stefano N, Brady JM, Matthews PM. 2004. Advances in functional and  
684 structural MR image analysis and implementation as FSL. *NeuroImage* **23**:S208–S219.  
685 doi:10.1016/j.neuroimage.2004.07.051
- 686 Solomon SG, Rosa MGP. 2014. A simpler primate brain: the visual system of the marmoset  
687 monkey. *Frontiers in Neural Circuits* **8**:96 doi:10.3389/fncir.2014.00096
- 688 Thomas Yeo BT, Krienen FM, Sepulcre J, Sabuncu MR, Lashkari D, Hollinshead M, Roffman JL,  
689 Smoller JW, Zöllei L, Polimeni JR, Fischl B, Liu H, Buckner RL. 2011. The organization  
690 of the human cerebral cortex estimated by intrinsic functional connectivity. *Journal of*  
691 *Neurophysiology* **106**:1125–1165. doi:10.1152/jn.00338.2011
- 692 Tomioka I, Ishibashi H, Minakawa EN, Motohashi HH, Takayama O, Saito Y, Popiel HA, Puentes  
693 S, Owari K, Nakatani T, Nogami N, Yamamoto K, Noguchi S, Yonekawa T, Tanaka Y,  
694 Fujita N, Suzuki H, Kikuchi H, Aizawa S, Nagano S, Yamada D, Nishino I, Ichinohe N,  
695 Wada K, Kohsaka S, Nagai Y, Seki K. 2017a. Transgenic Monkey Model of the  
696 Polyglutamine Diseases Recapitulating Progressive Neurological Symptoms. *eNeuro*  
697 **4**:1–16. doi:10.1523/ENEURO.0250-16.2017
- 698 Tomioka I, Nogami N, Nakatani T, Owari K, Fujita N, Motohashi H, Takayama O, Takae K, Nagai  
699 Y, Seki K. 2017b. Generation of transgenic marmosets using a tetracyclin-inducible  
700 transgene expression system as a neurodegenerative disease model. *Biology of*  
701 *Reproduction* **97**:772–780. doi:10.1093/biolre/iox129
- 702 Van Essen DC, Smith SM, Barch DM, Behrens TEJ, Yacoub E, Ugurbil K. 2013. The WU-Minn  
703 Human Connectome Project: An overview. *NeuroImage* **80**:62–79.  
704 doi:10.1016/j.neuroimage.2013.05.041
- 705 Vincent JL, Patel GH, Fox MD, Snyder AZ, Baker JT, Van Essen DC, Zempel JM, Snyder LH,  
706 Corbetta M, Raichle ME. 2007. Intrinsic functional architecture in the anaesthetized  
707 monkey brain. *Nature* **447**:83–86. doi:10.1038/nature05758

- 708 Wallis G, Stokes M, Cousijn H, Woolrich M, Nobre AC. 2015. Frontoparietal and Cingulo-  
709 opercular Networks Play Dissociable Roles in Control of Working Memory. *Journal of*  
710 *Cognitive Neuroscience* **27**:2019–2034. doi:10.1162/jocn\_a\_00838
- 711 Xiao Y, Beriault S, Pike GB, Collins DL. 2012. Multicontrast multiecho FLASH MRI for targeting  
712 the subthalamic nucleus. *Magnetic Resonance Imaging* **30**:627–640.  
713 doi:10.1016/j.mri.2012.02.006
- 714 Xiao Y, Fonov V, Bériault S, Subaie FA, Chakravarty MM, Sadikot AF, Pike GB, Collins DL. 2015.  
715 Multi-contrast unbiased MRI atlas of a Parkinson’s disease population. *International*  
716 *Journal of Computer Assisted Radiology and Surgery* **10**:329–341. doi:10.1007/s11548-  
717 014-1068-y
- 718 Yu H-H, Rosa MGP. 2010. A simple method for creating wide-field visual stimulus for  
719 electrophysiology: Mapping and analyzing receptive fields using a hemispheric display.  
720 *Journal of Vision* **10**:15. doi:10.1167/10.14.15
- 721 Zeater N, Buzás P, Dreher B, Grünert U, Martin PR. 2019. Projections of three subcortical visual  
722 centers to marmoset lateral geniculate nucleus. *Journal of Comparative Neurology*  
723 **527**:535–545. doi:10.1002/cne.24390
- 724
